# Supplementary material for: Metal-free synthesis of functionalized tacrine derivatives and their evaluation for acetyl/butyrylcholinesterase and α-glucosidase inhibition
Source: Royal Society of Chemistry journal article supplement (doi:10.1039/d3ob01760e), 2023-12-18
Supplement: d3ob01760e2.pdf [file d3ob01760e2.pdf]

analytic functional testing  
 UNICUBE  
 serial number: 0400BB1033

| Samples     |               |                  |        |        |        |        |       |       |       |        |           |           |            |          |
|-------------|---------------|------------------|--------|--------|--------|--------|-------|-------|-------|--------|-----------|-----------|------------|----------|
| Weight [mg] | Name          | Method           | N Area | C Area | H Area | S Area | N [%] | C [%] | H [%] | S [%]  | C/N ratio | C/H ratio | Date       | Time     |
| 1 1.0000    | Blank-        | Blank with O2    | 5 016  | 5 389  | 8 314  | 334    | 0.00  | 0.00  | 0.000 | 0.000  | 0.0000    | 0.0000    | 03-12-2023 | 11:08 PM |
| 2 1.0000    | Blank-        | Blank with O2    | 626    | 10     | 236    | 445    | 0.00  | 0.00  | 0.000 | 0.000  | 0.0000    | 0.0000    | 03-12-2023 | 11:22 PM |
| 3 1.0000    | Blank-        | Blank with O2    | 739    | 8      | 172    | 32     | 0.00  | 0.00  | 0.000 | 0.000  | 0.0000    | 0.0000    | 03-12-2023 | 11:32 PM |
| 4 1.0000    | Blank-        | Blank without O2 | 0      | 2      | 128    | 36     | 0.00  | 0.00  | 0.000 | 0.000  | 0.0000    | 0.0000    | 03-12-2023 | 11:42 PM |
| 5 1.0000    | Blank-        | Blank without O2 | 0      | 7      | 130    | 30     | 0.00  | 0.00  | 0.000 | 0.000  | 0.0000    | 0.0000    | 03-12-2023 | 11:52 PM |
| 6 1.0000    | Blank-        | Blank without O2 | 0      | 2      | 121    | 41     | 0.00  | 0.00  | 0.000 | 0.000  | 0.0000    | 0.0000    | 04-12-2023 | 12:01 AM |
| 7 2.3800    | RunIn         | 5mg Standard     | 16 862 | 30 193 | 10 487 | 5 628  | 16.26 | 40.98 | 4.441 | 16.727 | 2.5204    | 9.2280    | 04-12-2023 | 12:13 AM |
| 8 2.0300    | RunIn         | 5mg Standard     | 14 435 | 25 743 | 9 159  | 5 050  | 16.31 | 40.92 | 4.572 | 17.508 | 2.5091    | 8.9501    | 04-12-2023 | 12:25 AM |
| 9 1.6400    | sulfanilamide | 5mg Standard     | 11 880 | 21 078 | 7 477  | 4 166  | 16.60 | 41.41 | 4.666 | 17.691 | 2.4944    | 8.8741    | 04-12-2023 | 12:37 AM |
| 10 2.2000   | sulfanilamide | 5mg Standard     | 15 490 | 27 475 | 9 951  | 5 533  | 16.15 | 40.32 | 4.568 | 17.777 | 2.4959    | 8.8258    | 04-12-2023 | 12:48 AM |
| 11 2.0000   | sulfanilamide | 5mg Standard     | 14 246 | 25 209 | 9 197  | 5 134  | 16.34 | 40.67 | 4.659 | 18.080 | 2.4894    | 8.7277    | 04-12-2023 | 12:59 AM |
| 19 1.0000   | Blank-        | Blank with O2    | 970    | 17     | 182    | 74     | 0.00  | 0.00  | 0.000 | 0.000  | 0.0000    | 0.0000    | 04-12-2023 | 02:28 AM |
| 20 1.0000   | Blank-        | Blank with O2    | 948    | 18     | 120    | 39     | 0.00  | 0.00  | 0.000 | 0.000  | 0.0000    | 0.0000    | 04-12-2023 | 02:38 AM |
| 21 1.0000   | Blank-        | Blank with O2    | 912    | 17     | 124    | 35     | 0.00  | 0.00  | 0.000 | 0.000  | 0.0000    | 0.0000    | 04-12-2023 | 02:48 AM |
| 22 1.2300   | 8a            | 5mg Standard     | 3 825  | 30 514 | 7 428  | 46     | 7.46  | 86.07 | 6.491 | 0.182  | 11.5309   | 13.2588   | 04-12-2023 | 03:00 AM |
| 23 2.7300   | 8t            | 5mg Standard     | 8 549  | 64 235 | 15 462 | 2 860  | 7.32  | 78.38 | 5.697 | 7.831  | 10.7099   | 13.7578   | 04-12-2023 | 03:11 AM |

Printed by: eassuperuser

Access: unicube superuser

Print date: Mon Dec 4 03:41:05 2023

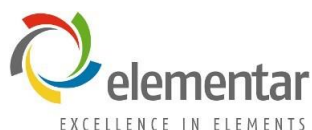

unicube V1.2.5 (38a8926) 2022-02-24

Serial No: 0400BB1033

Mode CHNS

analytic functional testing  
**UNICUBE**  
 serial number: 0400BB1033

|   | Weight [mg] | Na Method             | N Area | C Area | H Area | S Area | N [%] | C [%] | H [%] | S [%] | C/N ratio | C/H ratio | Date Time           |
|---|-------------|-----------------------|--------|--------|--------|--------|-------|-------|-------|-------|-----------|-----------|---------------------|
| 1 | 1.0000      | Bla Blank nk- with O2 | 5 016  | 5 389  | 8 314  | 334    | 0.00  | 0.00  | 0.000 | 0.000 | 0.0000    | 0.0000    | 03-12-2023 11:08 PM |

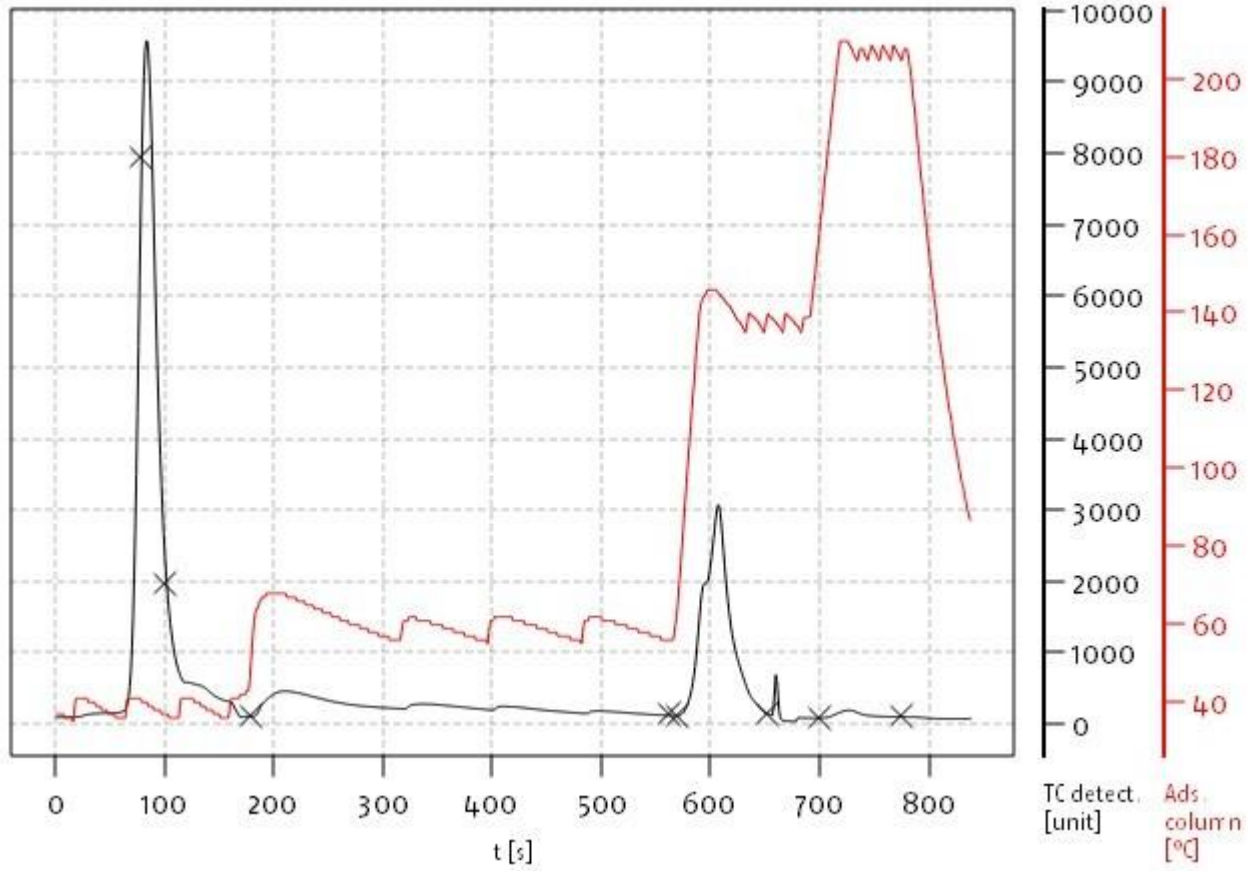

analytic functional testing  
**UNICUBE**  
 serial number: 0400BB1033

| Weight [mg] | Na Method me          | N Area | C Area | H Area | S Area | N [%] | C [%] | H [%] | S [%] | C/N ratio | C/H ratio | Date Time           |
|-------------|-----------------------|--------|--------|--------|--------|-------|-------|-------|-------|-----------|-----------|---------------------|
| 2 1.0000    | Bla Blank nk- with O2 | 626    | 10     | 236    | 445    | 0.00  | 0.00  | 0.000 | 0.000 | 0.0000    | 0.0000    | 03-12-2023 11:22 PM |

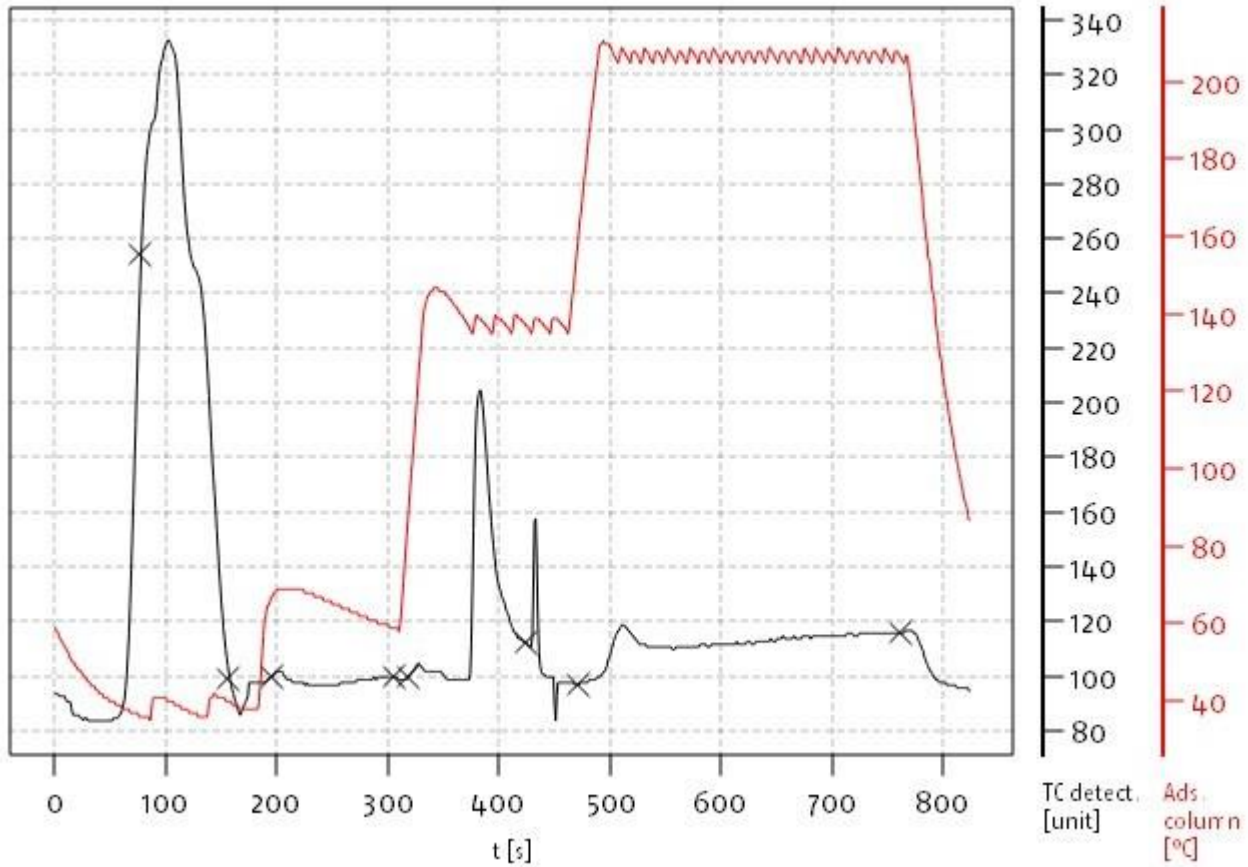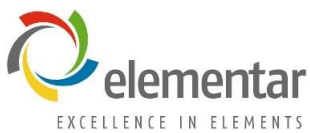

analytic functional testing  
**UNICUBE**  
 serial number: 0400BB1033

| Weight [mg] | Na Method me          | N Area | C Area | H Area | S Area | N [%] | C [%] | H [%] | S [%] | C/N ratio | C/H ratio | Date Time           |
|-------------|-----------------------|--------|--------|--------|--------|-------|-------|-------|-------|-----------|-----------|---------------------|
| 3 1.0000    | Bla Blank nk- with O2 | 739    | 8      | 172    | 32     | 0.00  | 0.00  | 0.000 | 0.000 | 0.0000    | 0.0000    | 03-12-2023 11:32 PM |

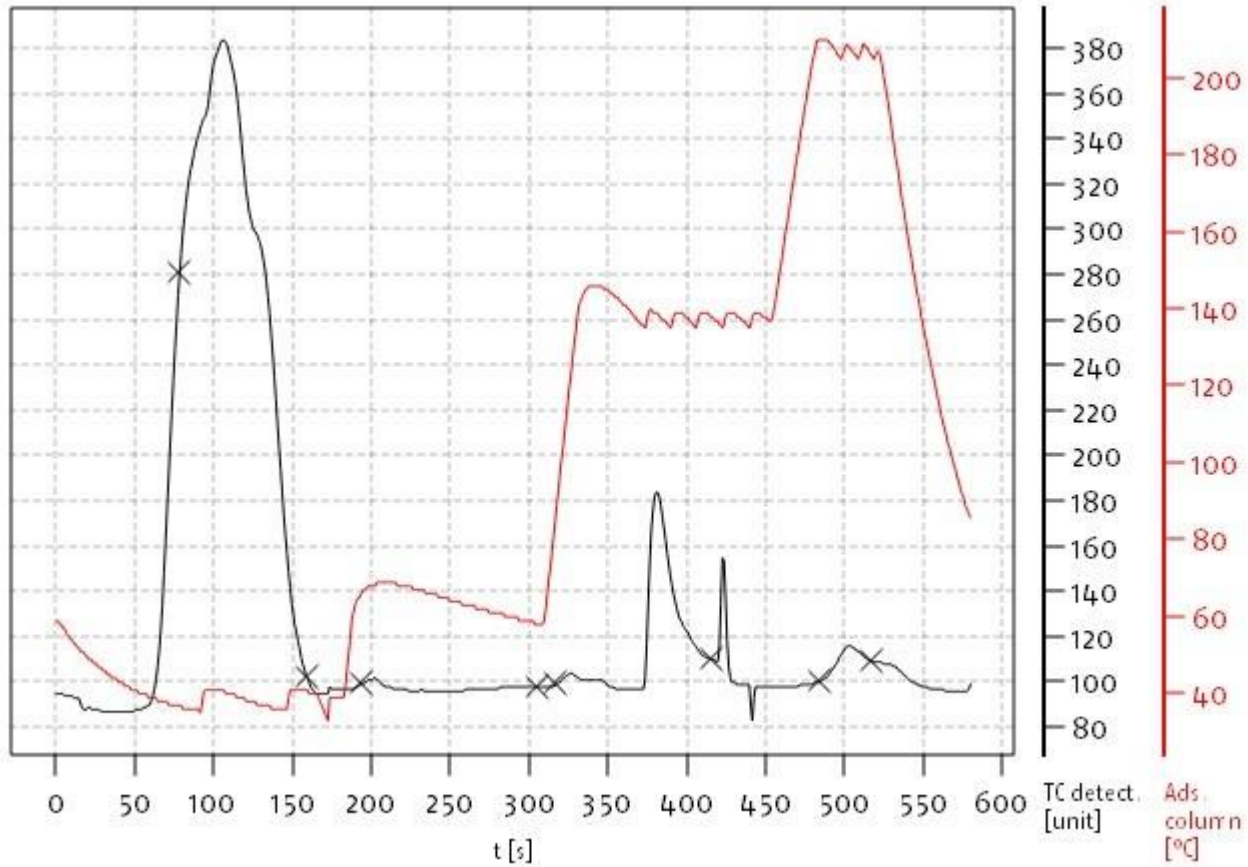

analytic functional testing  
**UNICUBE**  
 serial number: 0400BB1033

| Weight [mg] | Na Method me             | N Area | C Area | H Area | S Area | N [%] | C [%] | H [%] | S [%] | C/N ratio | C/H ratio | Date Time           |
|-------------|--------------------------|--------|--------|--------|--------|-------|-------|-------|-------|-----------|-----------|---------------------|
| 4 1.0000    | Bla Blank nk- without O2 | 0      | 2      | 128    | 36     | 0.00  | 0.00  | 0.000 | 0.000 | 0.0000    | 0.0000    | 03-12-2023 11:42 PM |

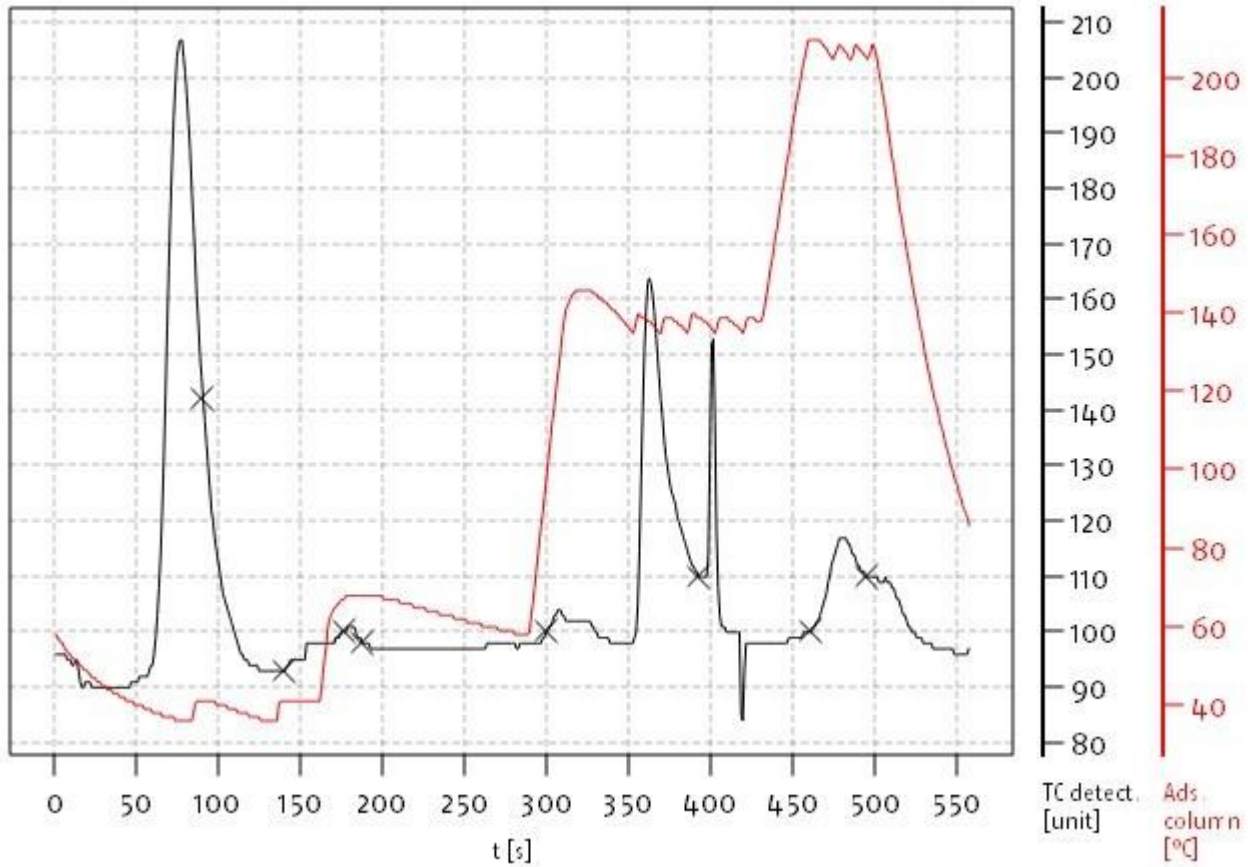

analytic functional testing  
**UNICUBE**  
 serial number: 0400BB1033

| Weight [mg] | Na Method me                   | N Area | C Area | H Area | S Area | N [%] | C [%] | H [%] | S [%] | C/N ratio | C/H ratio | Date Time              |
|-------------|--------------------------------|--------|--------|--------|--------|-------|-------|-------|-------|-----------|-----------|------------------------|
| 5 1.0000    | Bla Blank<br>nk- without<br>O2 | 0      | 7      | 130    | 30     | 0.00  | 0.00  | 0.000 | 0.000 | 0.0000    | 0.0000    | 03-12-2023<br>11:52 PM |

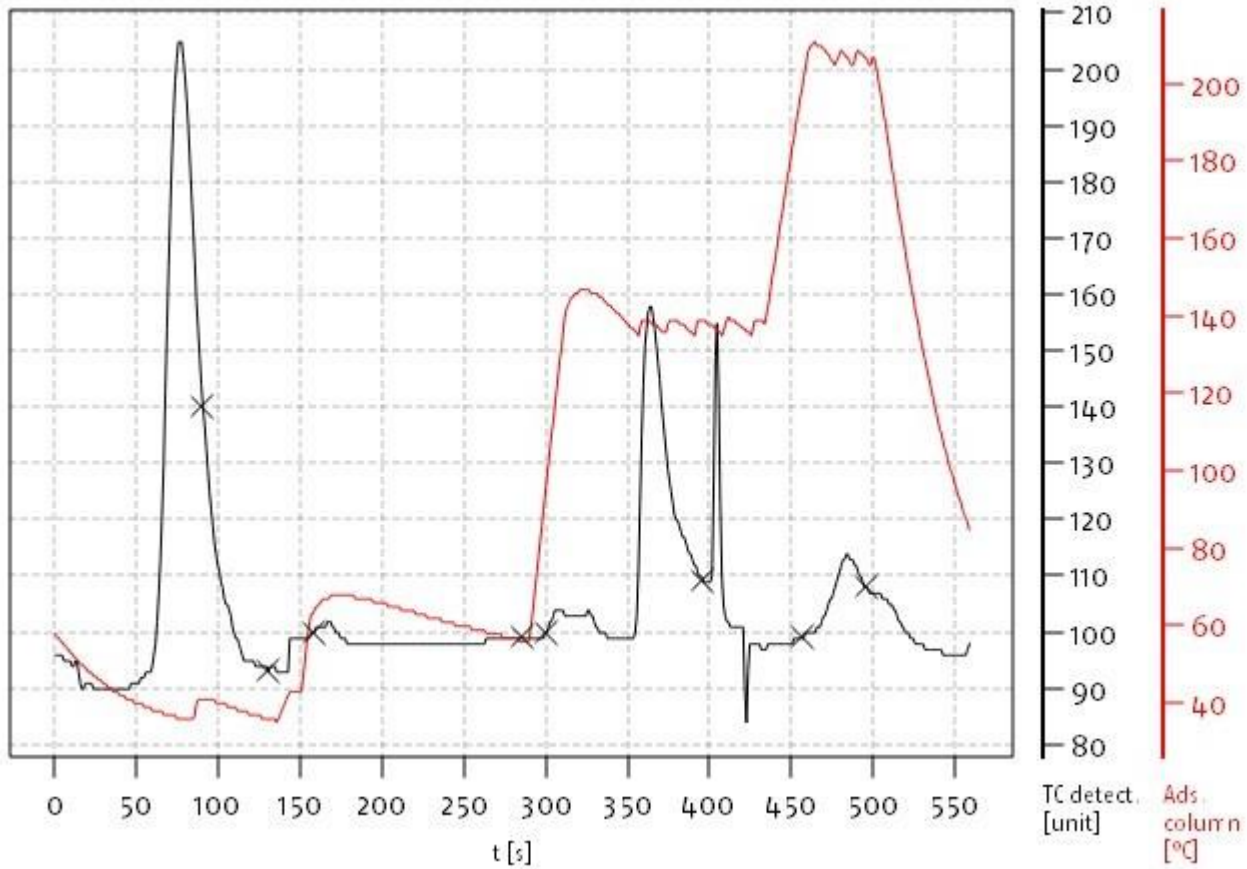



analytic functional testing  
**UNICUBE**  
 serial number: 0400BB1033

| Weight [mg] | Na Method me             | N Area | C Area | H Area | S Area | N [%] | C [%] | H [%] | S [%] | C/N ratio | C/H ratio | Date Time           |
|-------------|--------------------------|--------|--------|--------|--------|-------|-------|-------|-------|-----------|-----------|---------------------|
| 6 1.0000    | Bla Blank nk- without O2 | 0      | 2      | 121    | 41     | 0.00  | 0.00  | 0.000 | 0.000 | 0.0000    | 0.0000    | 04-12-2023 12:01 AM |

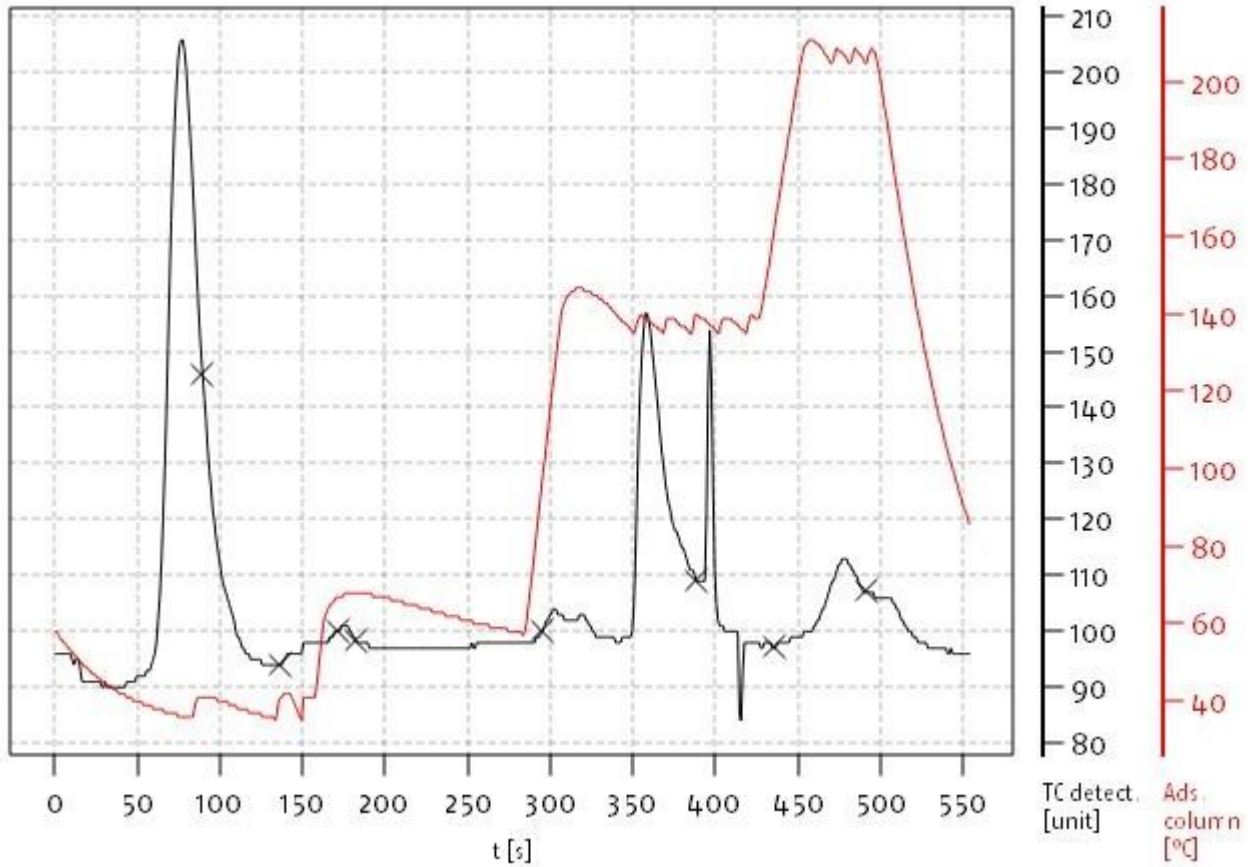

analytic functional testing  
**UNICUBE**  
 serial number: 0400BB1033

| Weight [mg] | Na Method           | N Area | C Area | H Area | S Area | N [%] | C [%] | H [%] | S [%]  | C/N ratio | C/H ratio | Date Time           |
|-------------|---------------------|--------|--------|--------|--------|-------|-------|-------|--------|-----------|-----------|---------------------|
| 7 2.3800    | Run 5mg In Standard | 16 862 | 30 193 | 10 487 | 5 628  | 16.26 | 40.98 | 4.441 | 16.727 | 2.5204    | 9.2280    | 04-12-2023 12:13 AM |

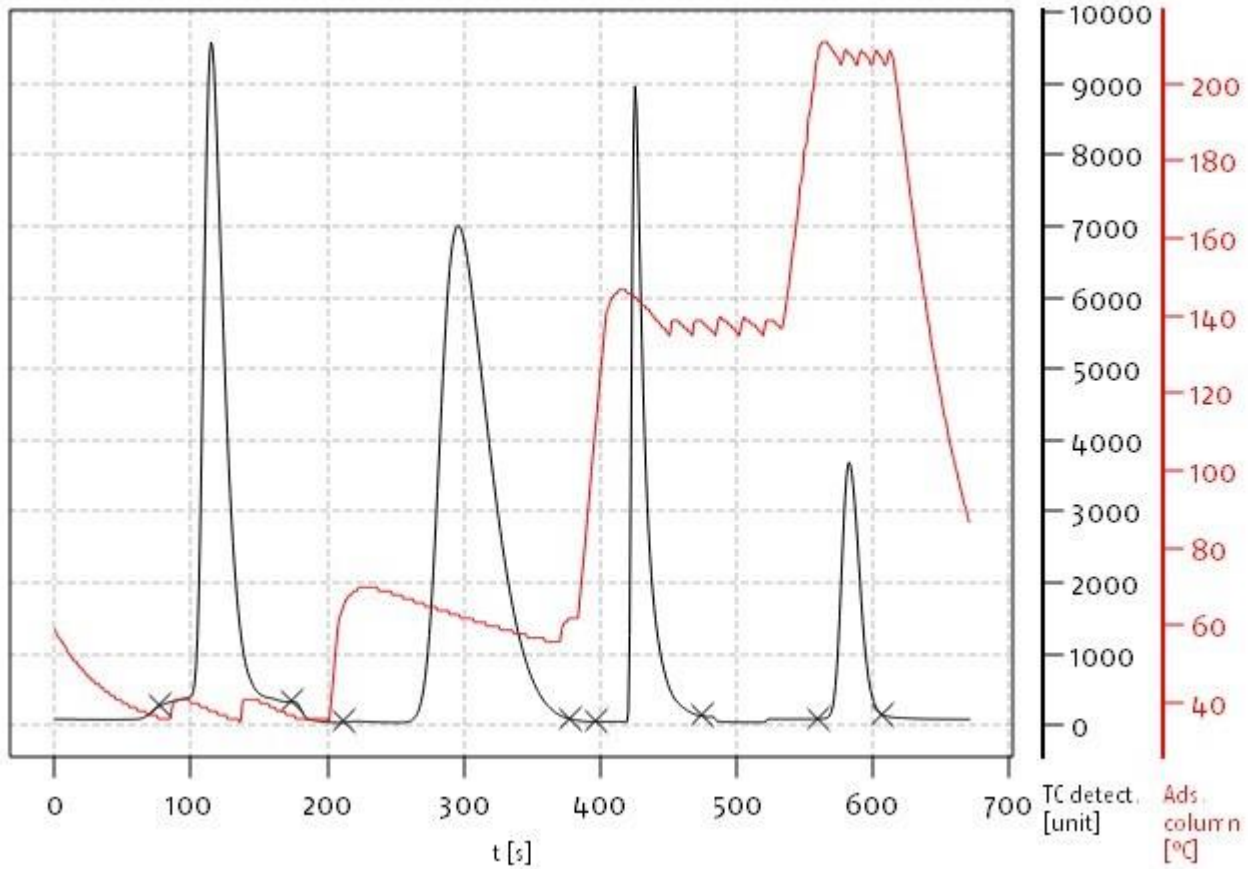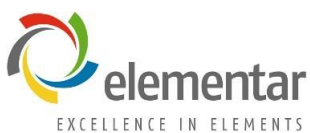



analytic functional testing  
**UNICUBE**  
 serial number: 0400BB1033

| Weight [mg] | Na Method           | N Area | C Area | H Area | S Area | N [%] | C [%] | H [%] | S [%]  | C/N ratio | C/H ratio | Date Time           |
|-------------|---------------------|--------|--------|--------|--------|-------|-------|-------|--------|-----------|-----------|---------------------|
| 8 2.0300    | Run 5mg In Standard | 14 435 | 25 743 | 9 159  | 5 050  | 16.31 | 40.92 | 4.572 | 17.508 | 2.5091    | 8.9501    | 04-12-2023 12:25 AM |

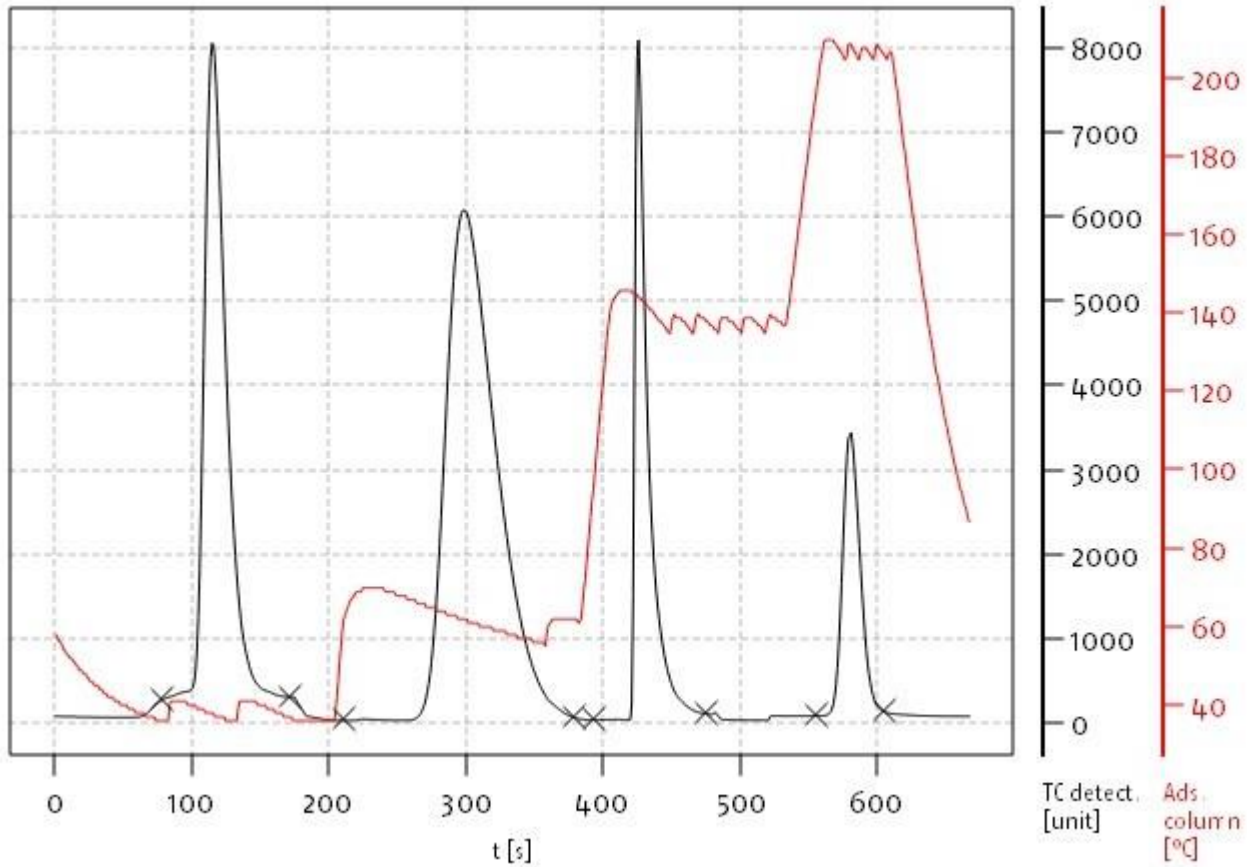

analytic functional testing  
**UNICUBE**  
 serial number: 0400BB1033

| Weight [mg] | Na Method                               | N Area | C Area | H Area | S Area | N [%] | C [%] | H [%] | S [%]  | C/N ratio | C/H ratio | Date Time              |
|-------------|-----------------------------------------|--------|--------|--------|--------|-------|-------|-------|--------|-----------|-----------|------------------------|
| 9 1.6400    | sulf 5mg<br>anil Standar<br>ami d<br>de | 11 880 | 21 078 | 7 477  | 4 166  | 16.60 | 41.41 | 4.666 | 17.691 | 2.4944    | 8.8741    | 04-12-2023<br>12:37 AM |

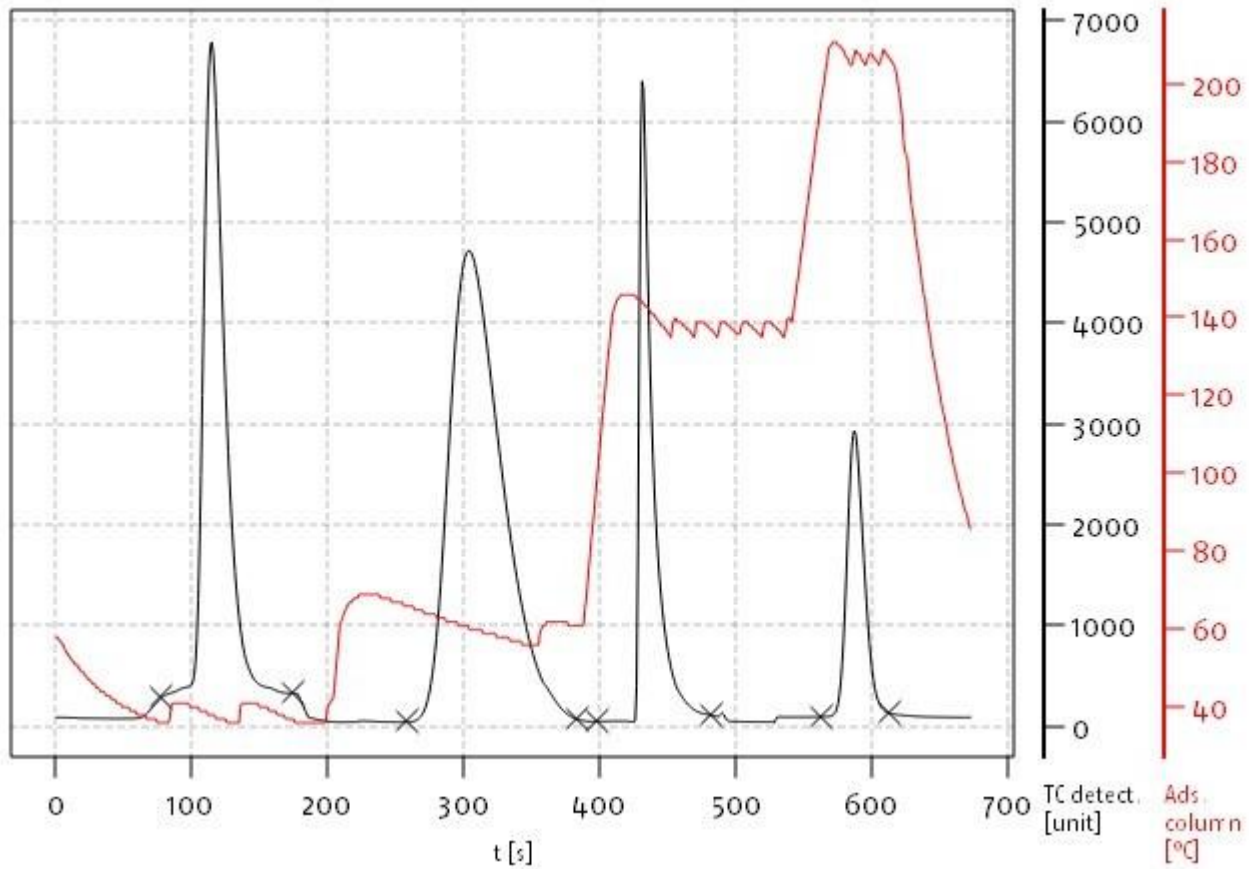

analytic functional testing  
**UNICUBE**  
 serial number: 0400BB1033

| Weight [mg] | Na Method                               | N Area | C Area | H Area | S Area | N [%] | C [%] | H [%] | S [%]  | C/N ratio | C/H ratio | Date Time              |
|-------------|-----------------------------------------|--------|--------|--------|--------|-------|-------|-------|--------|-----------|-----------|------------------------|
| 10 2.2000   | sulf 5mg<br>anil Standar<br>ami d<br>de | 15 490 | 27 475 | 9 951  | 5 533  | 16.15 | 40.32 | 4.568 | 17.777 | 2.4959    | 8.8258    | 04-12-2023<br>12:48 AM |

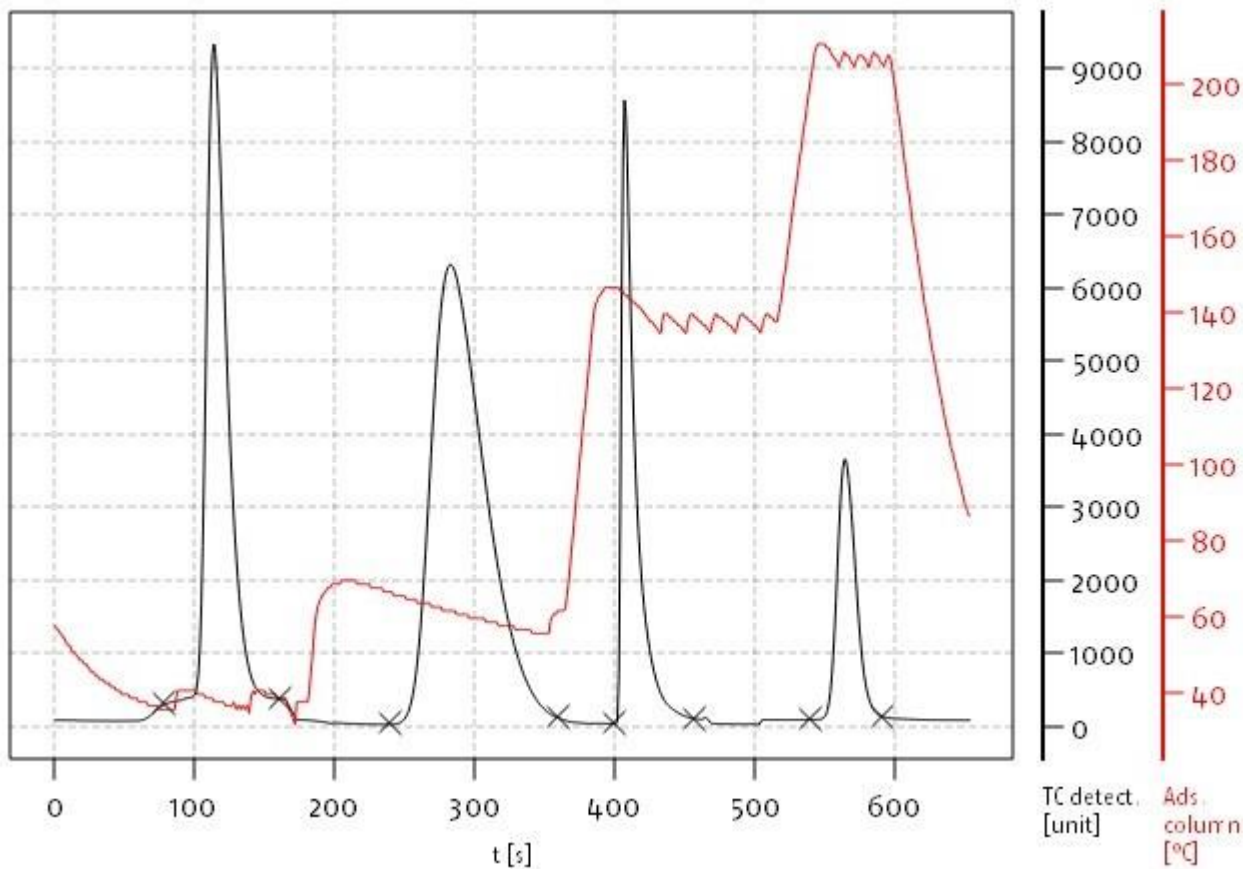

analytic functional testing  
**UNICUBE**  
 serial number: 0400BB1033

| Weight [mg] | Na Method                               | N Area | C Area | H Area | S Area | N [%] | C [%] | H [%] | S [%]  | C/N ratio | C/H ratio | Date Time              |
|-------------|-----------------------------------------|--------|--------|--------|--------|-------|-------|-------|--------|-----------|-----------|------------------------|
| 11 2.0000   | sulf 5mg<br>anil Standar<br>ami d<br>de | 14 246 | 25 209 | 9 197  | 5 134  | 16.34 | 40.67 | 4.659 | 18.080 | 2.4894    | 8.7277    | 04-12-2023<br>12:59 AM |

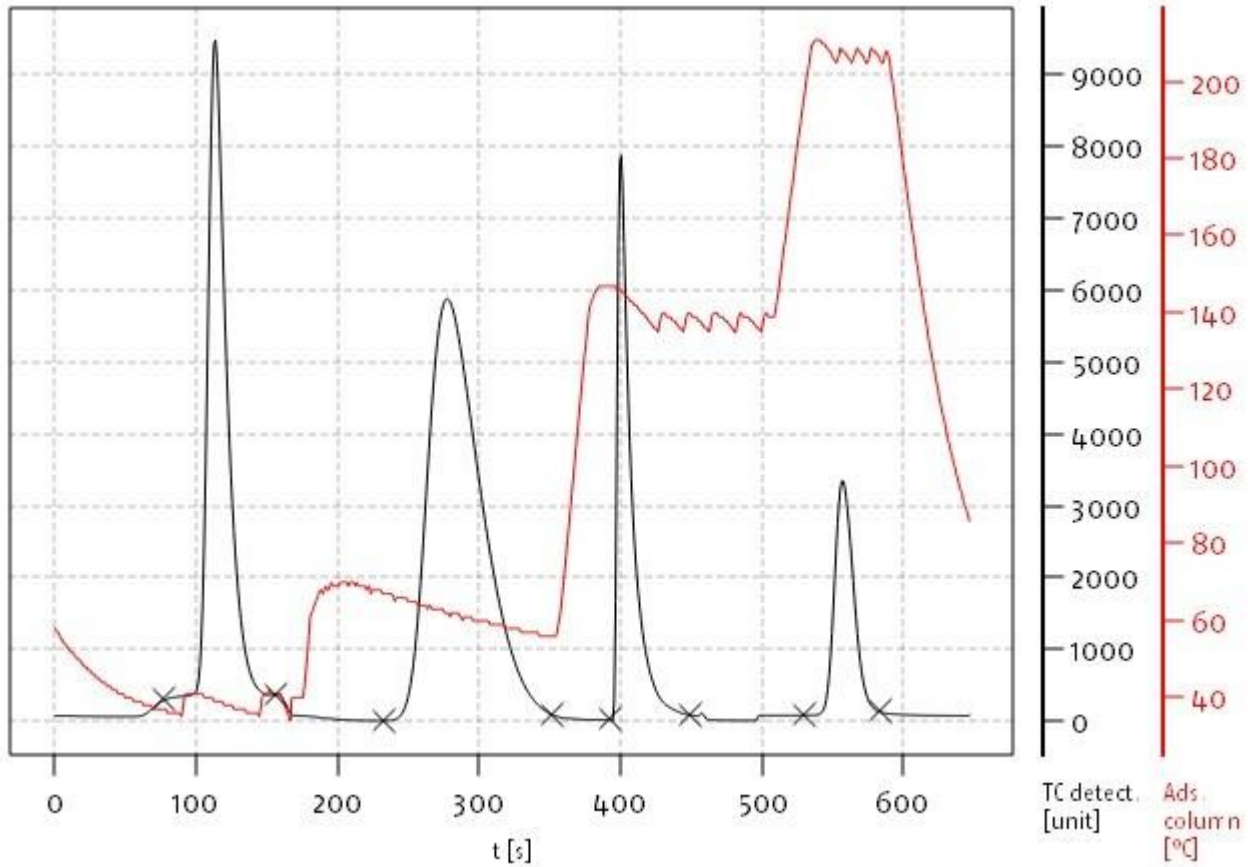

analytic functional testing  
**UNICUBE**  
 serial number: 0400BB1033

| Weight [mg] | Na Method me          | N Area | C Area | H Area | S Area | N [%] | C [%] | H [%] | S [%] | C/N ratio | C/H ratio | Date Time           |
|-------------|-----------------------|--------|--------|--------|--------|-------|-------|-------|-------|-----------|-----------|---------------------|
| 19 1.0000   | Bla Blank nk- with O2 | 970    | 17     | 182    | 74     | 0.00  | 0.00  | 0.000 | 0.000 | 0.0000    | 0.0000    | 04-12-2023 02:28 AM |

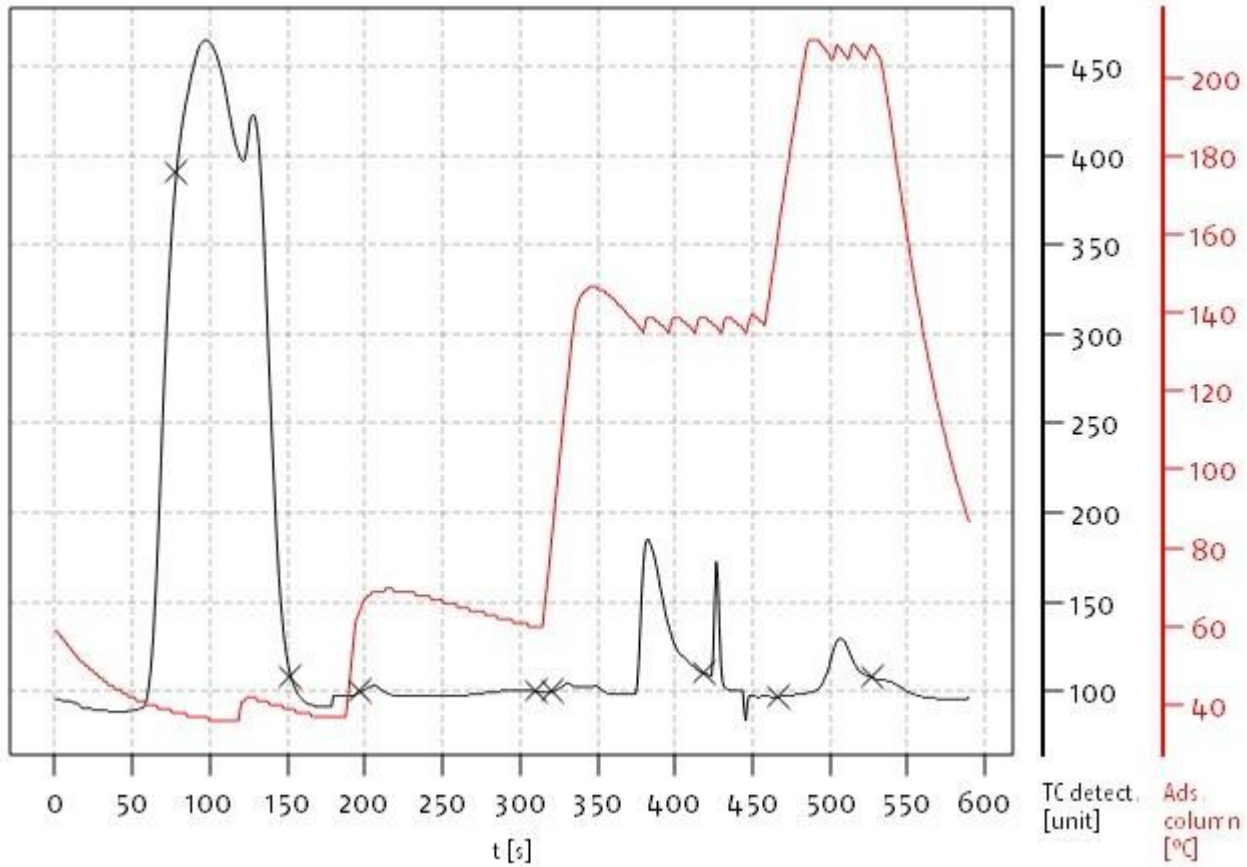

analytic functional testing  
**UNICUBE**  
 serial number: 0400BB1033

| Weight [mg] | Na Method me          | N Area | C Area | H Area | S Area | N [%] | C [%] | H [%] | S [%] | C/N ratio | C/H ratio | Date Time           |
|-------------|-----------------------|--------|--------|--------|--------|-------|-------|-------|-------|-----------|-----------|---------------------|
| 20 1.0000   | Bla Blank nk- with O2 | 948    | 18     | 120    | 39     | 0.00  | 0.00  | 0.000 | 0.000 | 0.0000    | 0.0000    | 04-12-2023 02:38 AM |

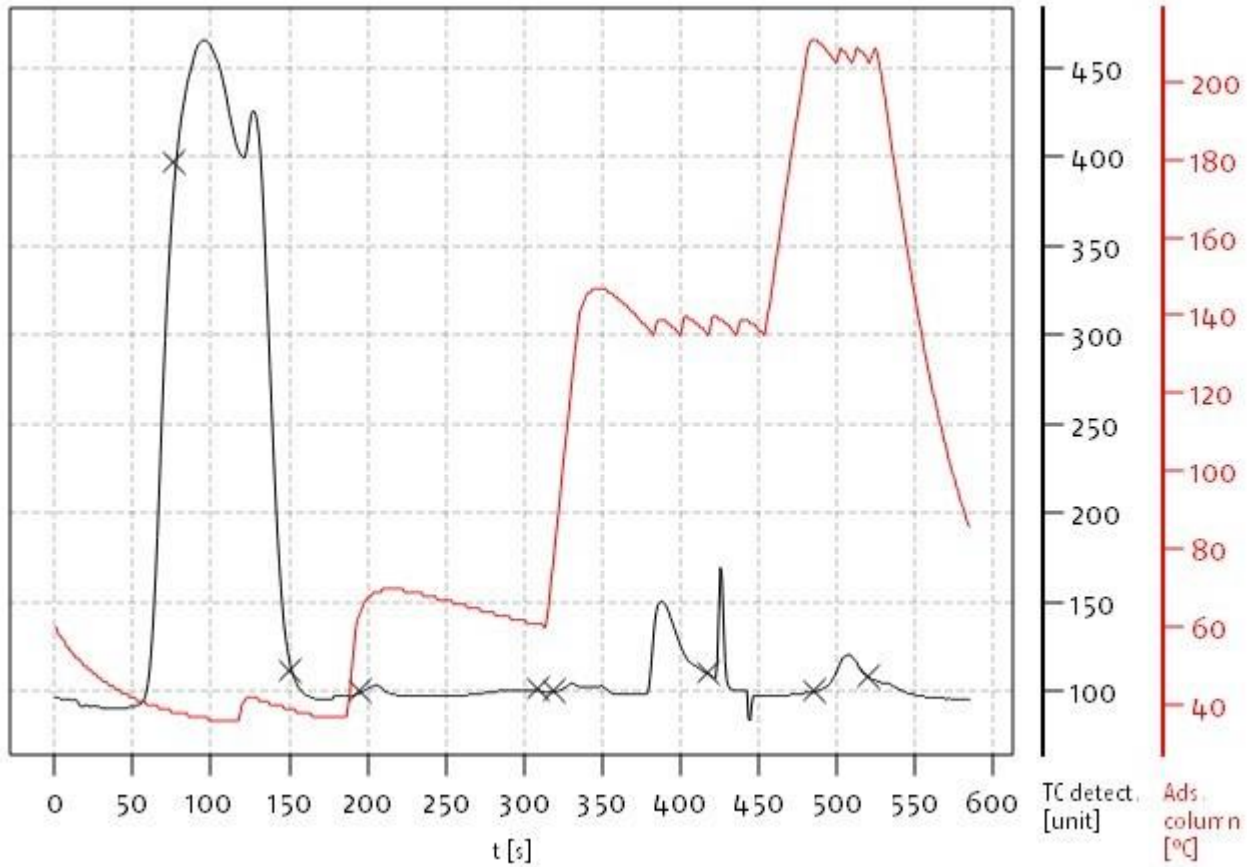



analytic functional testing  
**UNICUBE**  
 serial number: 0400BB1033

| Weight [mg] | Na Method me          | N Area | C Area | H Area | S Area | N [%] | C [%] | H [%] | S [%] | C/N ratio | C/H ratio | Date Time           |
|-------------|-----------------------|--------|--------|--------|--------|-------|-------|-------|-------|-----------|-----------|---------------------|
| 21 1.0000   | Bla Blank nk- with O2 | 912    | 17     | 124    | 35     | 0.00  | 0.00  | 0.000 | 0.000 | 0.0000    | 0.0000    | 04-12-2023 02:48 AM |

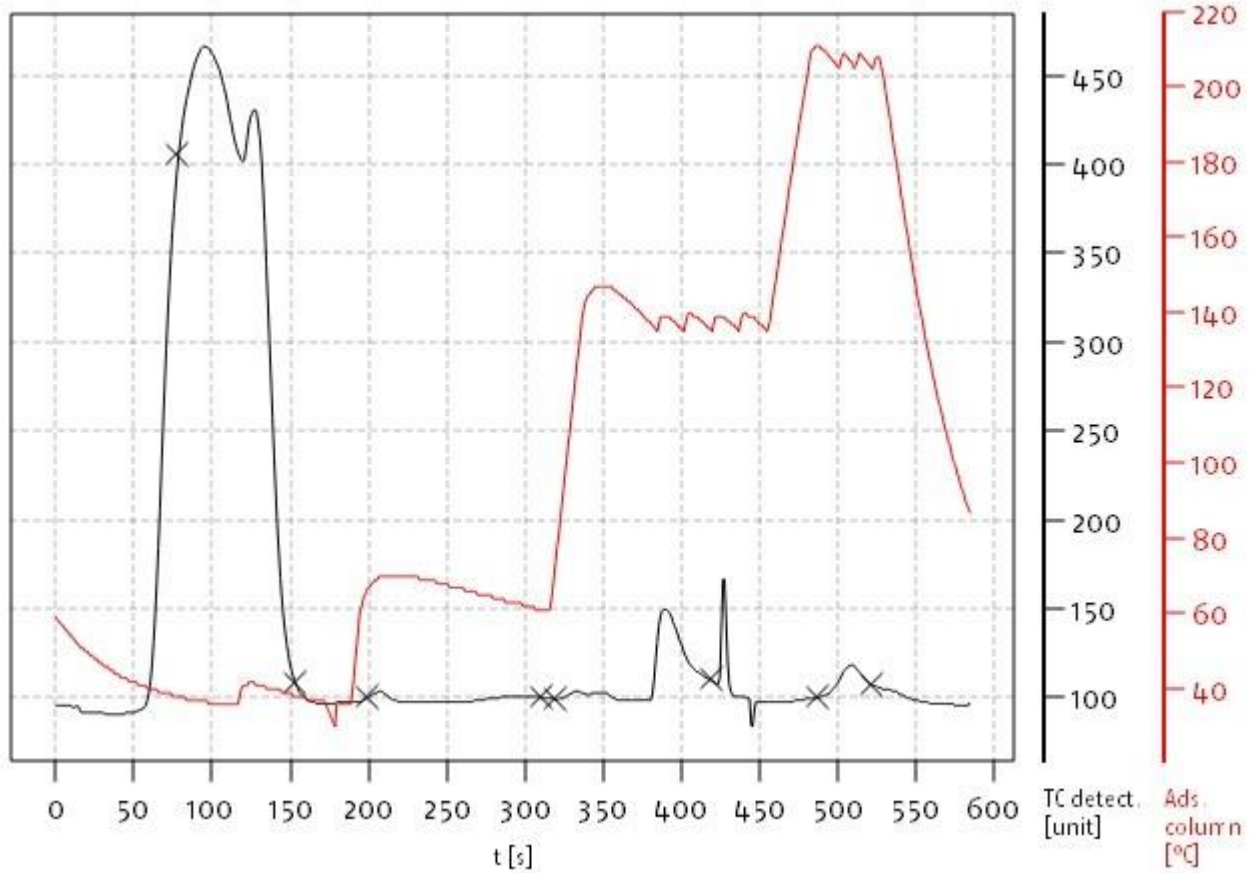

analytic functional testing  
**UNICUBE**  
 serial number: 0400BB1033

| Weight [mg] | Na me | Method       | N Area | C Area | H Area | S Area | N [%] | C [%] | H [%] | S [%] | C/N ratio | C/H ratio | Date Time           |
|-------------|-------|--------------|--------|--------|--------|--------|-------|-------|-------|-------|-----------|-----------|---------------------|
| 22 1.2300   | 8a    | 5mg Standard | 3 825  | 30 514 | 7 428  | 46     | 7.46  | 86.07 | 6.491 | 0.182 | 11.5309   | 13.2588   | 04-12-2023 03:00 AM |

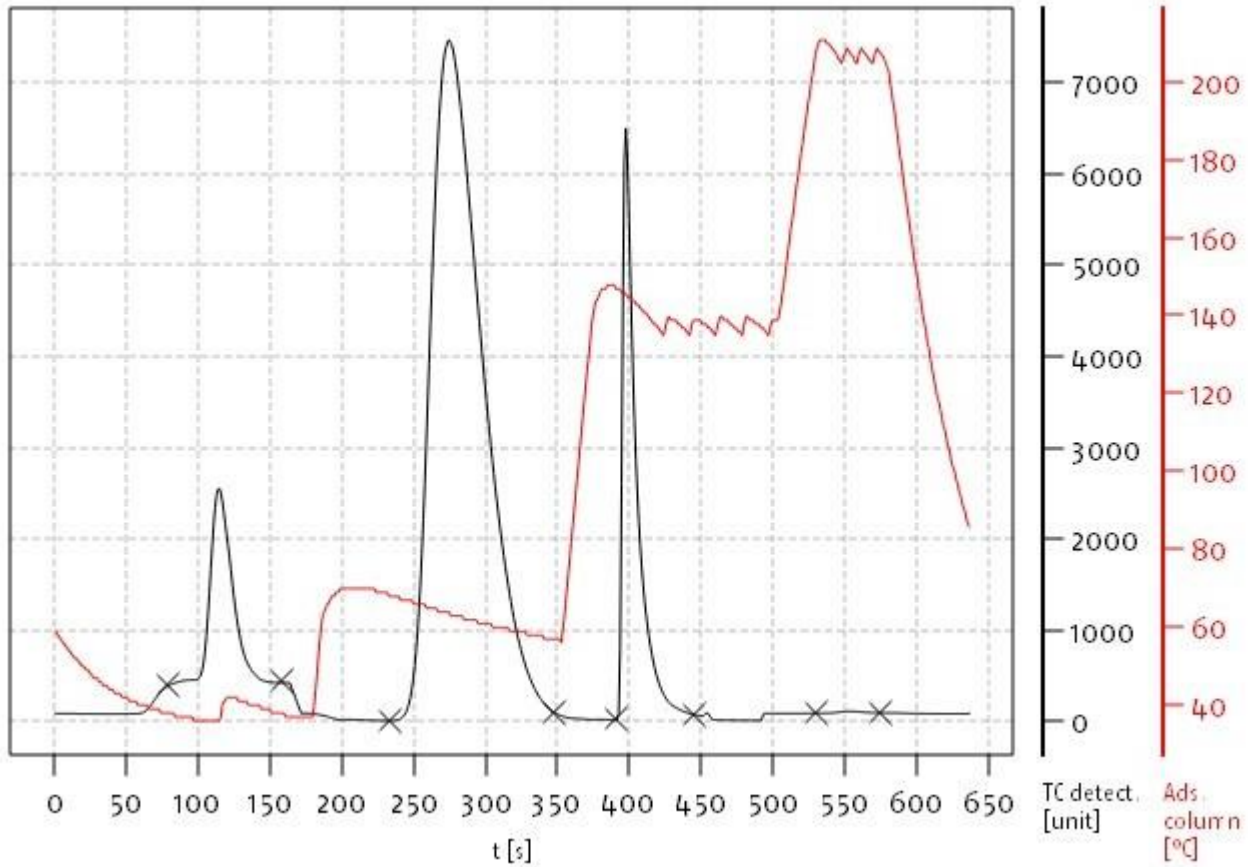

analytic functional testing  
**UNICUBE**  
 serial number: 0400BB1033

|    | Weight [mg] | Name | Method       | N Area | C Area | H Area | S Area | N [%] | C [%] | H [%] | S [%] | C/N ratio | C/H ratio | Date Time           |
|----|-------------|------|--------------|--------|--------|--------|--------|-------|-------|-------|-------|-----------|-----------|---------------------|
| 23 | 2.7300      | 8t   | 5mg Standard | 8 549  | 64 235 | 15 462 | 2 860  | 7.32  | 78.38 | 5.697 | 7.831 | 10.7099   | 13.7578   | 04-12-2023 03:11 AM |

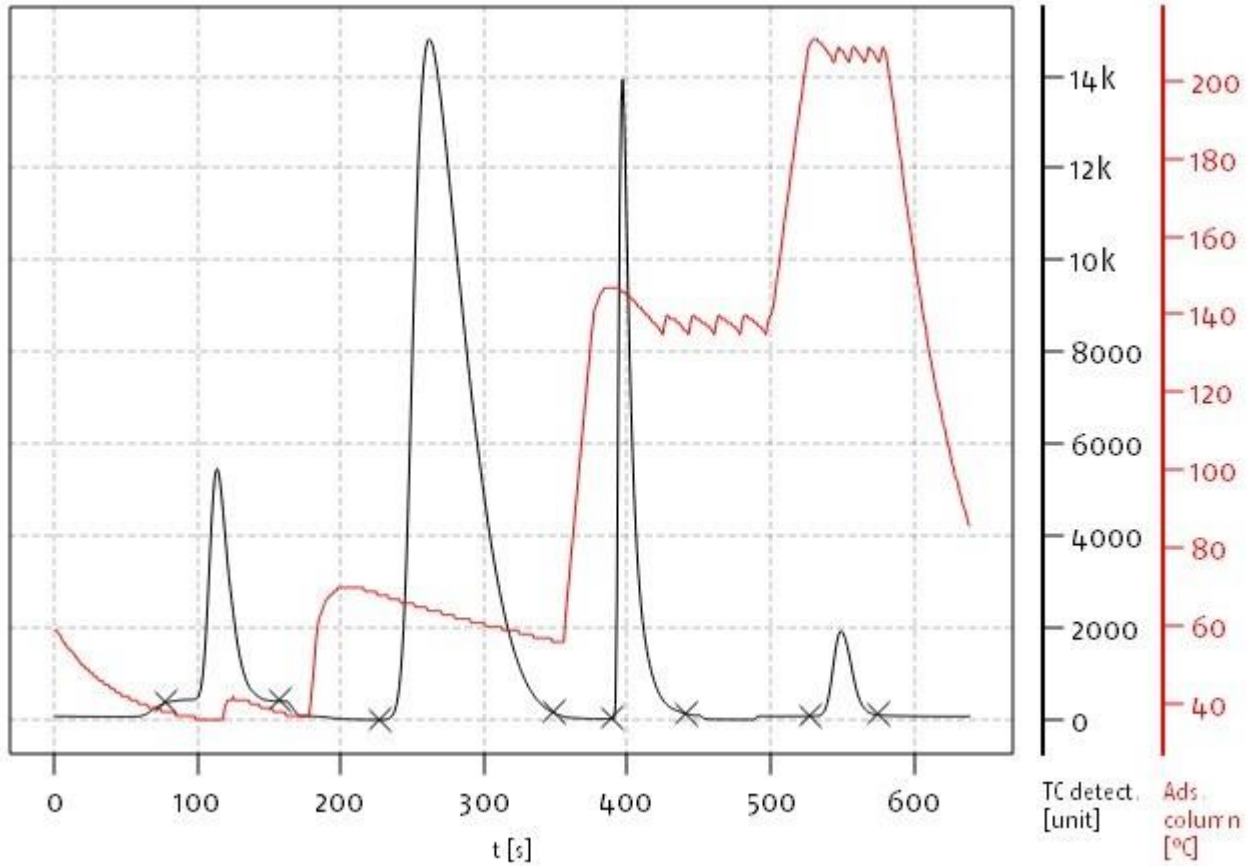

analytical functional testing  
 UNICUBE  
 serial number: 0400BB1033

| Samples     |               |                  |        |        |        |        |       |       |       |        |           |           |            |          |
|-------------|---------------|------------------|--------|--------|--------|--------|-------|-------|-------|--------|-----------|-----------|------------|----------|
| Weight [mg] | Name          | Method           | N Area | C Area | H Area | S Area | N [%] | C [%] | H [%] | S [%]  | C/N ratio | C/H ratio | Date       | Time     |
| 1 1.0000    | blank-        | Blank with O2    | 3 778  | 116    | 10 643 | 230    | 0.00  | 0.00  | 0.000 | 0.000  | 0.0000    | 0.0000    | 04-12-2023 | 10:59 PM |
| 2 1.0000    | blank-        | Blank with O2    | 1 541  | 11     | 182    | 35     | 0.00  | 0.00  | 0.000 | 0.000  | 0.0000    | 0.0000    | 04-12-2023 | 11:10 PM |
| 3 1.0000    | blank-        | Blank with O2    | 1 652  | 12     | 153    | 37     | 0.00  | 0.00  | 0.000 | 0.000  | 0.0000    | 0.0000    | 04-12-2023 | 11:20 PM |
| 4 1.0000    | blank-        | Blank without O2 | 0      | 6      | 75     | 19     | 0.00  | 0.00  | 0.000 | 0.000  | 0.0000    | 0.0000    | 04-12-2023 | 11:30 PM |
| 5 1.0000    | blank-        | Blank without O2 | 0      | 19     | 78     | 23     | 0.00  | 0.00  | 0.000 | 0.000  | 0.0000    | 0.0000    | 04-12-2023 | 11:39 PM |
| 6 1.0000    | blank-        | Blank without O2 | 0      | 6      | 69     | 21     | 0.00  | 0.00  | 0.000 | 0.000  | 0.0000    | 0.0000    | 04-12-2023 | 11:49 PM |
| 7 1.6900    | RunIn         | 5mg Standard     | 14 271 | 21 380 | 7 319  | 2 874  | 19.37 | 40.76 | 4.437 | 12.180 | 2.1049    | 9.1868    | 05-12-2023 | 12:01 AM |
| 8 2.7600    | RunIn         | 5mg Standard     | 19 566 | 33 544 | 12 227 | 6 291  | 16.28 | 39.28 | 4.440 | 16.198 | 2.4135    | 8.8473    | 05-12-2023 | 12:13 AM |
| 9 1.9300    | sulfanilamide | 5mg Standard     | 16 643 | 25 652 | 8 986  | 4 902  | 16.23 | 41.84 | 4.680 | 18.630 | 2.5779    | 8.9402    | 05-12-2023 | 12:25 AM |
| 10 2.2200   | sulfanilamide | 5mg Standard     | 15 953 | 27 252 | 9 976  | 5 551  | 16.23 | 41.84 | 4.680 | 18.630 | 2.5779    | 8.9402    | 05-12-2023 | 12:36 AM |
| 11 1.0000   | blank-        | Blank with O2    | 1 538  | 13     | 746    | 548    | 0.00  | 0.00  | 0.000 | 0.000  | 0.0000    | 0.0000    | 05-12-2023 | 01:04 AM |
| 12 1.0000   | blank-        | Blank with O2    | 1 370  | 14     | 85     | 129    | 0.00  | 0.00  | 0.000 | 0.000  | 0.0000    | 0.0000    | 05-12-2023 | 01:14 AM |
| 13 1.1300   | 8e            | 5mg Standard     | 2 654  | 25 854 | 7 220  | 123    | 7.06  | 82.69 | 6.158 | 0.069  | 11.7107   | 13.4273   | 05-12-2023 | 01:26 AM |
| 14 1.0000   | Blank-        | Blank with O2    | 1 236  | 15     | 144    | 117    | 0.00  | 0.00  | 0.000 | 0.000  | 0.0000    | 0.0000    | 05-12-2023 | 01:36 AM |
| 15 1.0000   | blank-        | Blank with O2    | 1 245  | 13     | 73     | 77     | 0.00  | 0.00  | 0.000 | 0.000  | 0.0000    | 0.0000    | 05-12-2023 | 01:46 AM |
| 16 1.3300   | 3d            | 5mg Standard     | 5 809  | 32 830 | 8 960  | 90     | 12.58 | 80.33 | 7.038 | 0.040  | 6.3847    | 11.4129   | 05-12-2023 | 01:58 AM |
| 17 1.6700   | 9             | 5mg Standard     | 6 134  | 34 987 | 8 848  | 83     | 8.46  | 67.73 | 5.377 | 0.288  | 8.0021    | 12.5943   | 05-12-2023 | 02:09 AM |
| 18 3.2200   | 8s            | 5mg Standard     | 12 864 | 71 561 | 17 963 | 109    | 9.89  | 76.86 | 5.532 | 0.021  | 7.7708    | 13.8945   | 05-12-2023 | 02:20 AM |
| 19 1.7400   | 3f            | 5mg Standard     | 9 444  | 40 377 | 11 195 | 116    | 12.62 | 72.44 | 5.174 | 0.004  | 5.7405    | 14.0002   | 05-12-2023 | 02:32 AM |
| 20 1.1000   | 3c            | 5mg Standard     | 3 356  | 21 100 | 7 652  | 113    | 11.63 | 69.77 | 5.333 | 0.006  | 6.0008    | 13.0831   | 05-12-2023 | 02:43 AM |
| 21 2.9400   | 8k            | 5mg Standard     | 8 084  | 67 965 | 18 444 | 225    | 6.65  | 79.64 | 6.217 | 0.005  | 11.9784   | 12.8101   | 05-12-2023 | 03:09 AM |

Printed by: eassuperuser

Access: unicube superuser

Print date: Tue Dec 5 07:40:52 2023

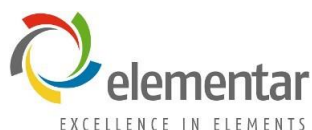

unicube V1.2.5 (38a8926) 2022-02-24

Serial No: 0400BB1033

Mode CHNS

analytic functional testing  
UNICUBE  
serial number: 0400BB1033

**Samples**

|    |        |        |               |       |    |     |     |      |       |       |       |        |         |                     |
|----|--------|--------|---------------|-------|----|-----|-----|------|-------|-------|-------|--------|---------|---------------------|
| 22 | 1.0000 | blank- | Blank with O2 | 1 388 | 24 | 356 | 124 | 0.00 | 0.00  | 0.000 | 0.000 | 0.0000 | 0.0000  | 05-12-2023 03:25 AM |
| 23 | 2.2900 | 8m     | 5mg Standard  | 8 696 | 48 | 12  | 105 | 8.90 | 71.91 | 5.391 | 0.003 | 8.0800 | 13.3386 | 05-12-2023 03:36 AM |

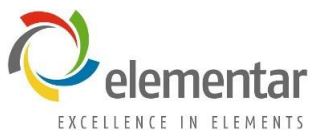

analytic functional testing  
**UNICUBE**  
 serial number: 0400BB1033

|   | Weight [mg] | Na  | Method        | N Area | C Area | H Area | S Area | N [%] | C [%] | H [%] | S [%] | C/N ratio | C/H ratio | Date Time           |
|---|-------------|-----|---------------|--------|--------|--------|--------|-------|-------|-------|-------|-----------|-----------|---------------------|
| 1 | 1.0000      | bla | Blank with O2 | 3 778  | 116    | 10 643 | 230    | 0.00  | 0.00  | 0.000 | 0.000 | 0.0000    | 0.0000    | 04-12-2023 10:59 PM |

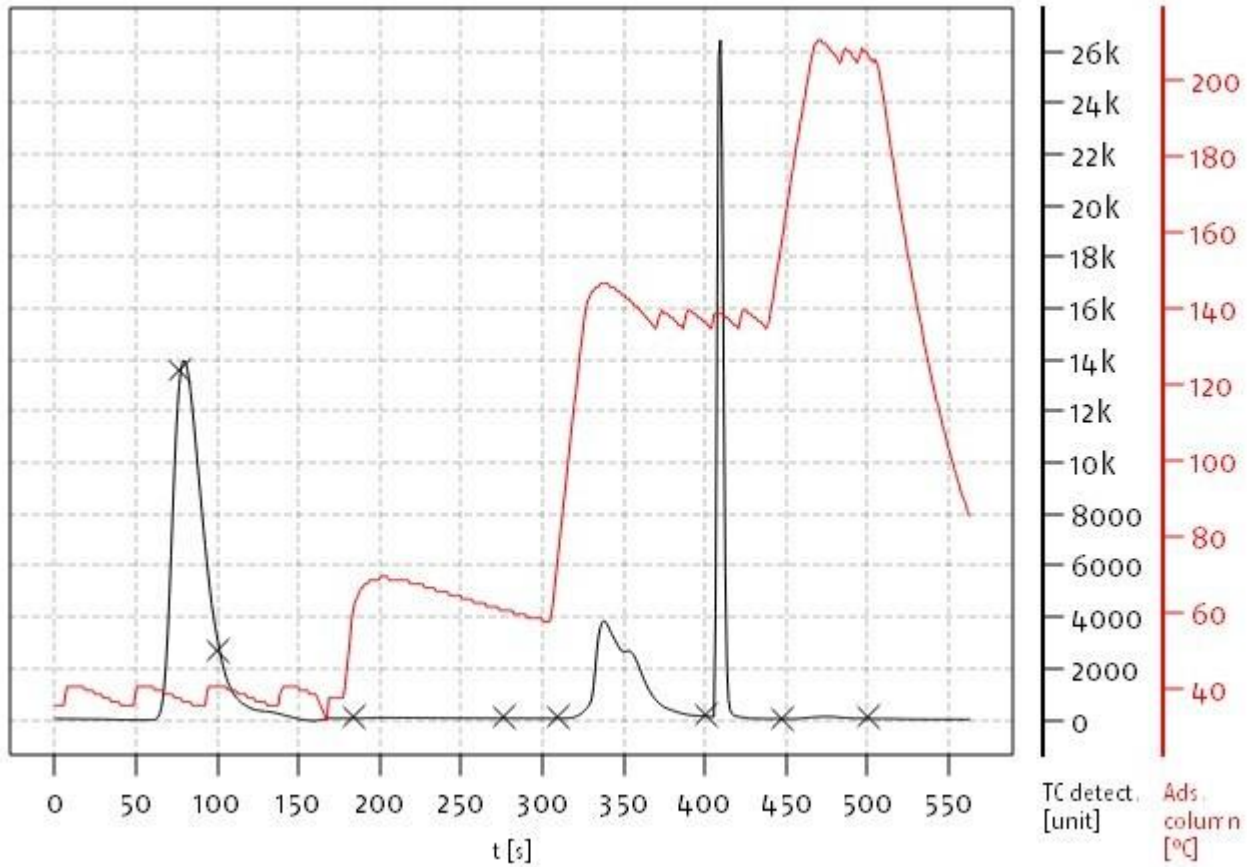



analytic functional testing  
**UNICUBE**  
 serial number: 0400BB1033

| Weight [mg] | Na me   | Method        | N Area | C Area | H Area | S Area | N [%] | C [%] | H [%] | S [%] | C/N ratio | C/H ratio | Date Time           |
|-------------|---------|---------------|--------|--------|--------|--------|-------|-------|-------|-------|-----------|-----------|---------------------|
| 2 1.0000    | bla nk- | Blank with O2 | 1 541  | 11     | 182    | 35     | 0.00  | 0.00  | 0.000 | 0.000 | 0.0000    | 0.0000    | 04-12-2023 11:10 PM |

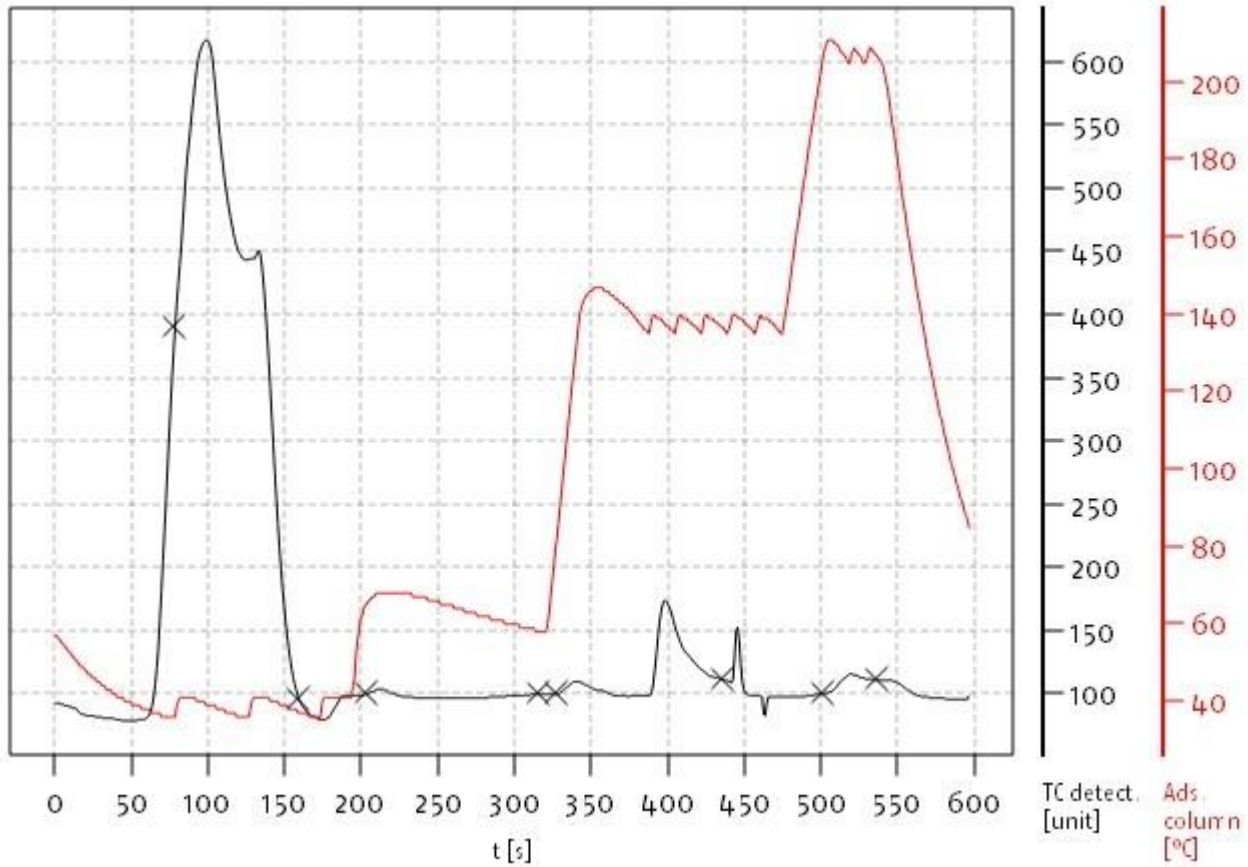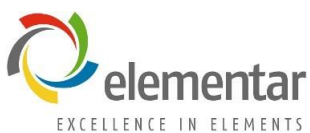

analytic functional testing  
**UNICUBE**  
 serial number: 0400BB1033

| Weight [mg] | Na me   | Method        | N Area | C Area | H Area | S Area | N [%] | C [%] | H [%] | S [%] | C/N ratio | C/H ratio | Date Time           |
|-------------|---------|---------------|--------|--------|--------|--------|-------|-------|-------|-------|-----------|-----------|---------------------|
| 3 1.0000    | bla nk- | Blank with O2 | 1 652  | 12     | 153    | 37     | 0.00  | 0.00  | 0.000 | 0.000 | 0.0000    | 0.0000    | 04-12-2023 11:20 PM |

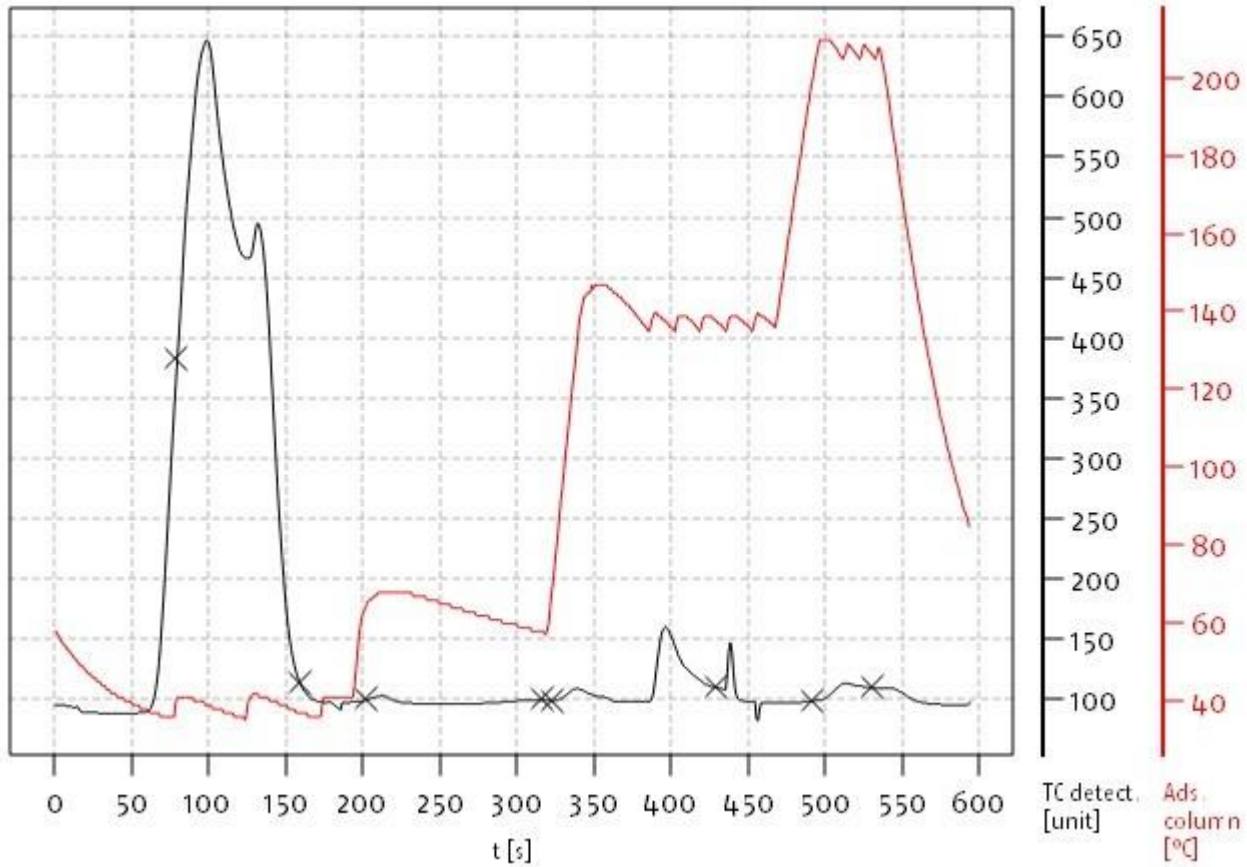

analytic functional testing  
**UNICUBE**  
 serial number: 0400BB1033

| Weight [mg] | Na me   | Method           | N Area | C Area | H Area | S Area | N [%] | C [%] | H [%] | S [%] | C/N ratio | C/H ratio | Date Time           |
|-------------|---------|------------------|--------|--------|--------|--------|-------|-------|-------|-------|-----------|-----------|---------------------|
| 4 1.0000    | bla nk- | Blank without O2 | 0      | 6      | 75     | 19     | 0.00  | 0.00  | 0.000 | 0.000 | 0.0000    | 0.0000    | 04-12-2023 11:30 PM |

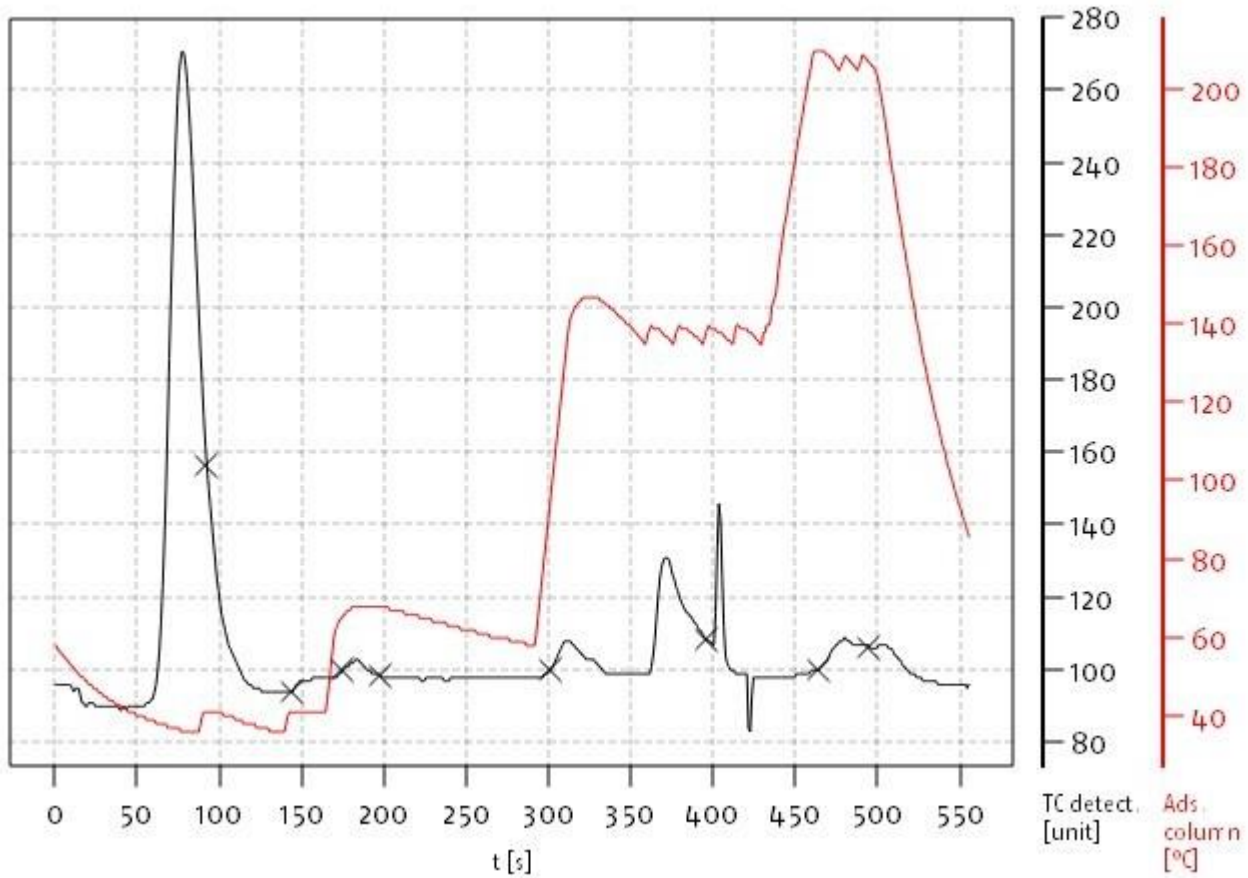

analytic functional testing  
**UNICUBE**  
 serial number: 0400BB1033

| Weight [mg] | Na     | Method                      | N Area | C Area | H Area | S Area | N [%] | C [%] | H [%] | S [%] | C/N ratio | C/H ratio | Date Time              |
|-------------|--------|-----------------------------|--------|--------|--------|--------|-------|-------|-------|-------|-----------|-----------|------------------------|
| 5           | 1.0000 | bla<br>nk-<br>without<br>O2 | 0      | 19     | 78     | 23     | 0.00  | 0.00  | 0.000 | 0.000 | 0.0000    | 0.0000    | 04-12-2023<br>11:39 PM |

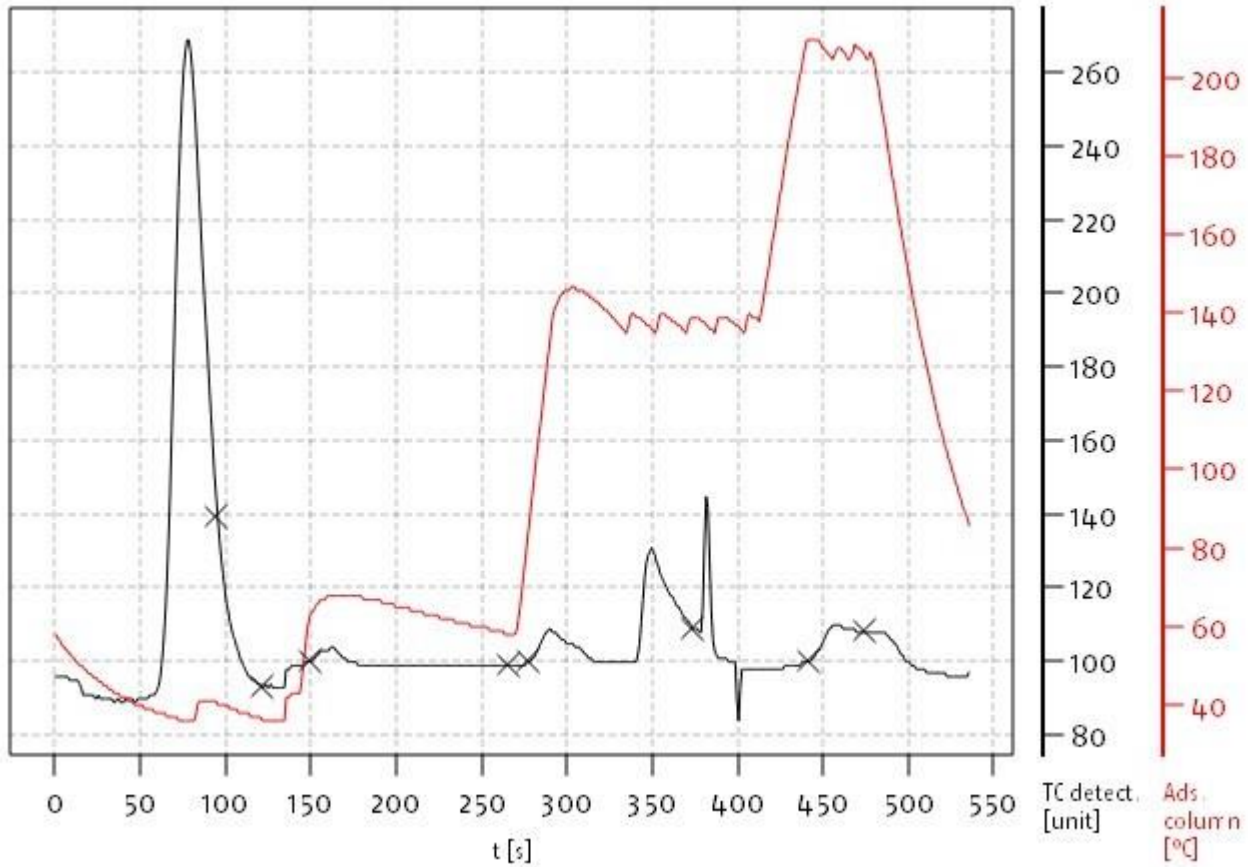

analytic functional testing  
**UNICUBE**  
 serial number: 0400BB1033

| Weight [mg] | Na  | Method           | N Area | C Area | H Area | S Area | N [%] | C [%] | H [%] | S [%] | C/N ratio | C/H ratio | Date Time           |
|-------------|-----|------------------|--------|--------|--------|--------|-------|-------|-------|-------|-----------|-----------|---------------------|
| 6 1.0000    | bla | Blank without O2 | 0      | 6      | 69     | 21     | 0.00  | 0.00  | 0.000 | 0.000 | 0.0000    | 0.0000    | 04-12-2023 11:49 PM |

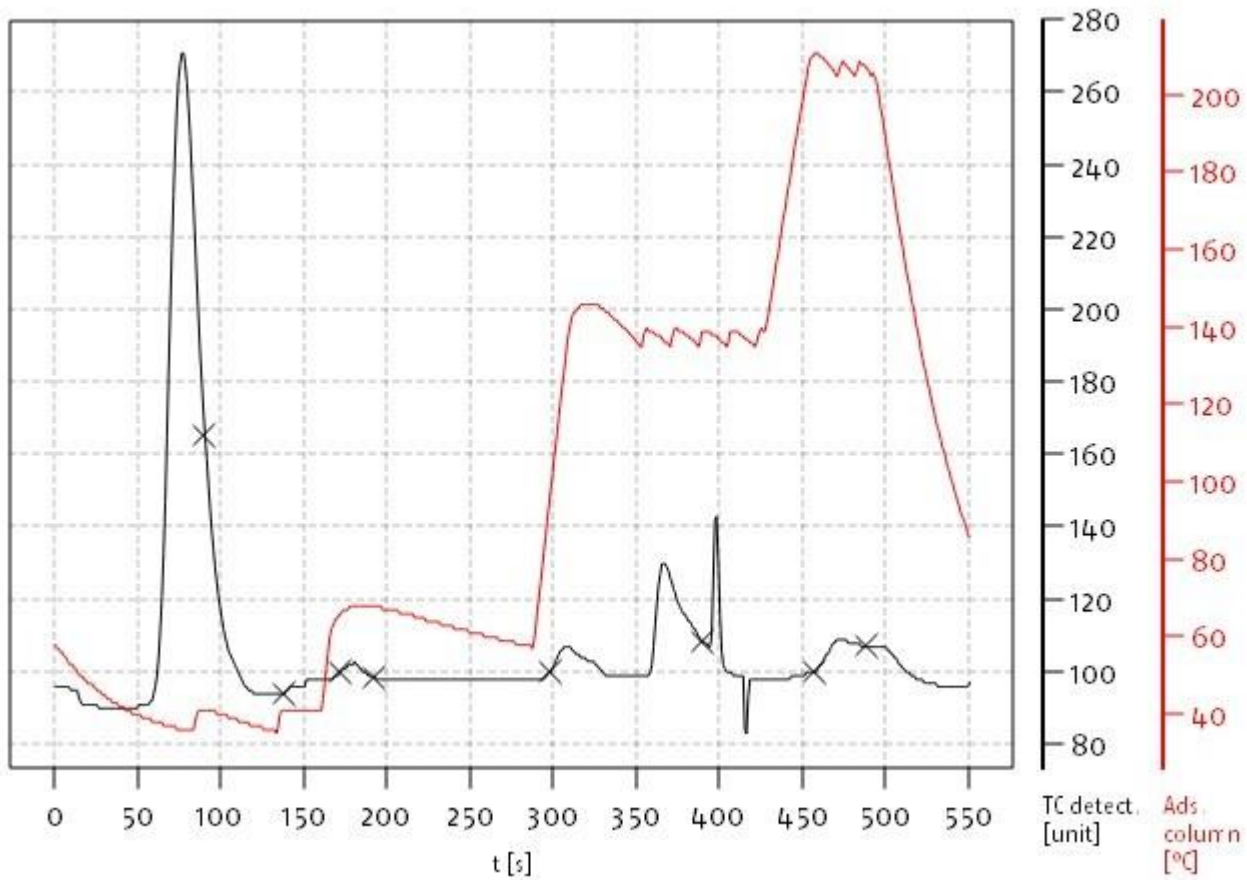

analytic functional testing  
**UNICUBE**  
 serial number: 0400BB1033

| Weight [mg] | Na  | Method          | N Area | C Area | H Area | S Area | N [%] | C [%] | H [%] | S [%]  | C/N ratio | C/H ratio | Date Time           |
|-------------|-----|-----------------|--------|--------|--------|--------|-------|-------|-------|--------|-----------|-----------|---------------------|
| 7 1.6900    | Run | 5mg In Standard | 14 271 | 21 380 | 7 319  | 2 874  | 19.37 | 40.76 | 4.437 | 12.180 | 2.1049    | 9.1868    | 05-12-2023 12:01 AM |

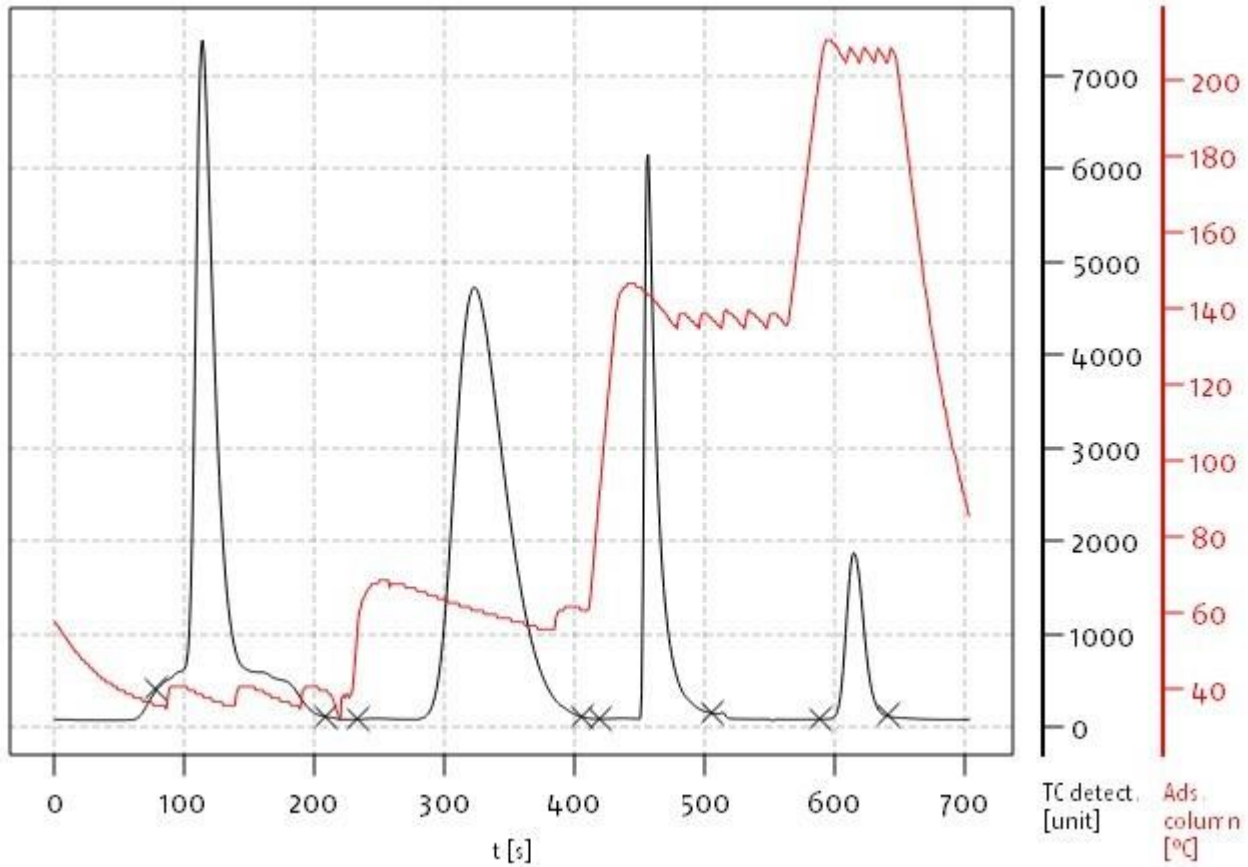



analytic functional testing  
 UNICUBE  
 serial number: 0400BB1033

| Weight [mg] | Na     | Method              | N Area | C Area | H Area | S Area | N [%] | C [%] | H [%] | S [%]  | C/N ratio | C/H ratio | Date Time           |
|-------------|--------|---------------------|--------|--------|--------|--------|-------|-------|-------|--------|-----------|-----------|---------------------|
| 8           | 2.7600 | Run 5mg In Standard | 19 566 | 33 544 | 12 227 | 6 291  | 16.28 | 39.28 | 4.440 | 16.198 | 2.4135    | 8.8473    | 05-12-2023 12:13 AM |

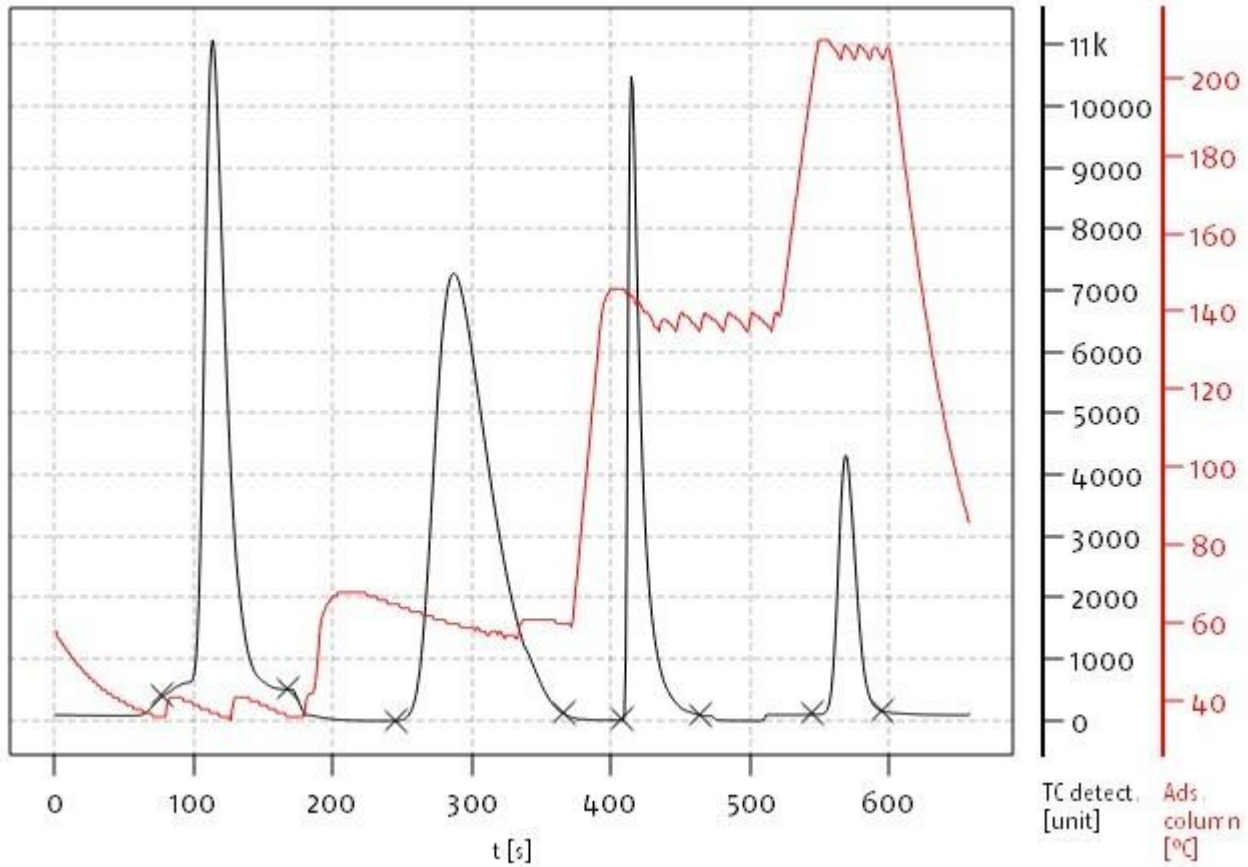

| Weight [mg] | Na   | Method                                      | N Area | C Area | H Area | S Area | N [%] | C [%] | H [%] | S [%]  | C/N ratio | C/H ratio | Date Time              |
|-------------|------|---------------------------------------------|--------|--------|--------|--------|-------|-------|-------|--------|-----------|-----------|------------------------|
| 9 1.9300    | sulf | 5mg<br>me<br>Standar<br>anil<br>ami d<br>de | 16 643 | 25 652 | 8 986  | 4 902  | 16.23 | 41.84 | 4.680 | 18.630 | 2.5779    | 8.9402    | 05-12-2023<br>12:25 AM |

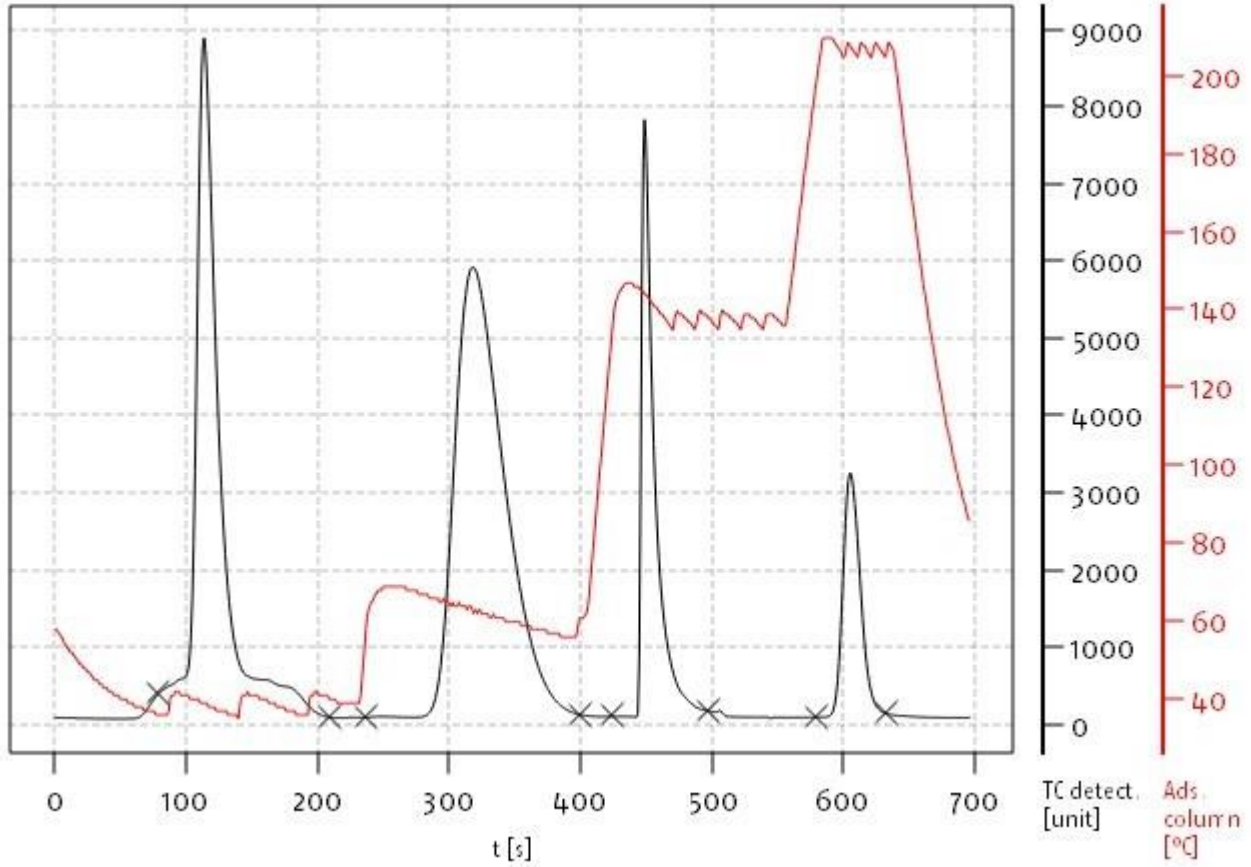

| Weight [mg] | Na   | Method                    | N Area | C Area | H Area | S Area | N [%] | C [%] | H [%] | S [%]  | C/N ratio | C/H ratio | Date Time           |
|-------------|------|---------------------------|--------|--------|--------|--------|-------|-------|-------|--------|-----------|-----------|---------------------|
| 10 2.2200   | sulf | 5mg anil Standar ami d de | 15 953 | 27 252 | 9 976  | 5 551  | 16.23 | 41.84 | 4.680 | 18.630 | 2.5779    | 8.9402    | 05-12-2023 12:36 AM |

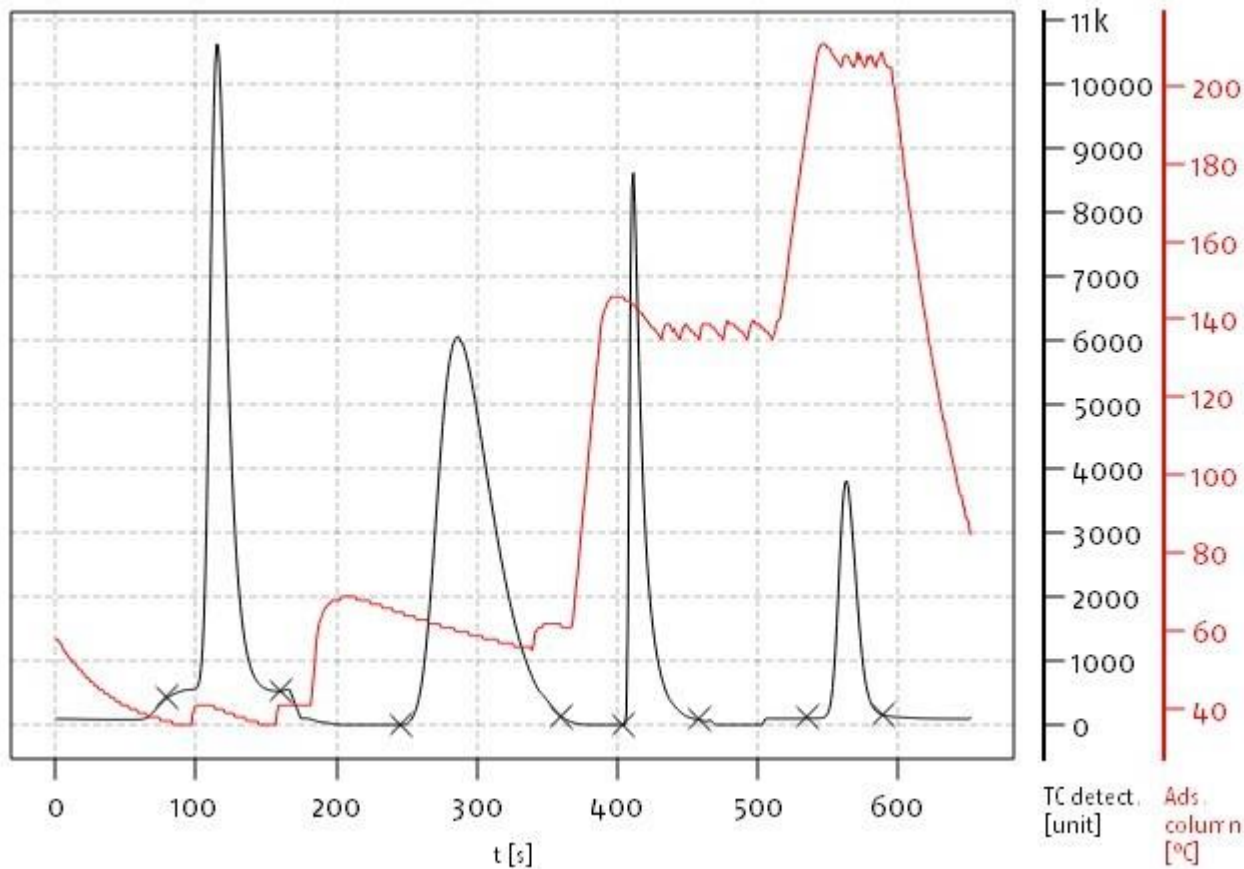

|    | Weight [mg] | Na  | Method        | N Area | C Area | H Area | S Area | N [%] | C [%] | H [%] | S [%] | C/N ratio | C/H ratio | Date Time           |
|----|-------------|-----|---------------|--------|--------|--------|--------|-------|-------|-------|-------|-----------|-----------|---------------------|
| 11 | 1.0000      | bla | Blank with O2 | 1 538  | 13     | 746    | 548    | 0.00  | 0.00  | 0.000 | 0.000 | 0.0000    | 0.0000    | 05-12-2023 01:04 AM |

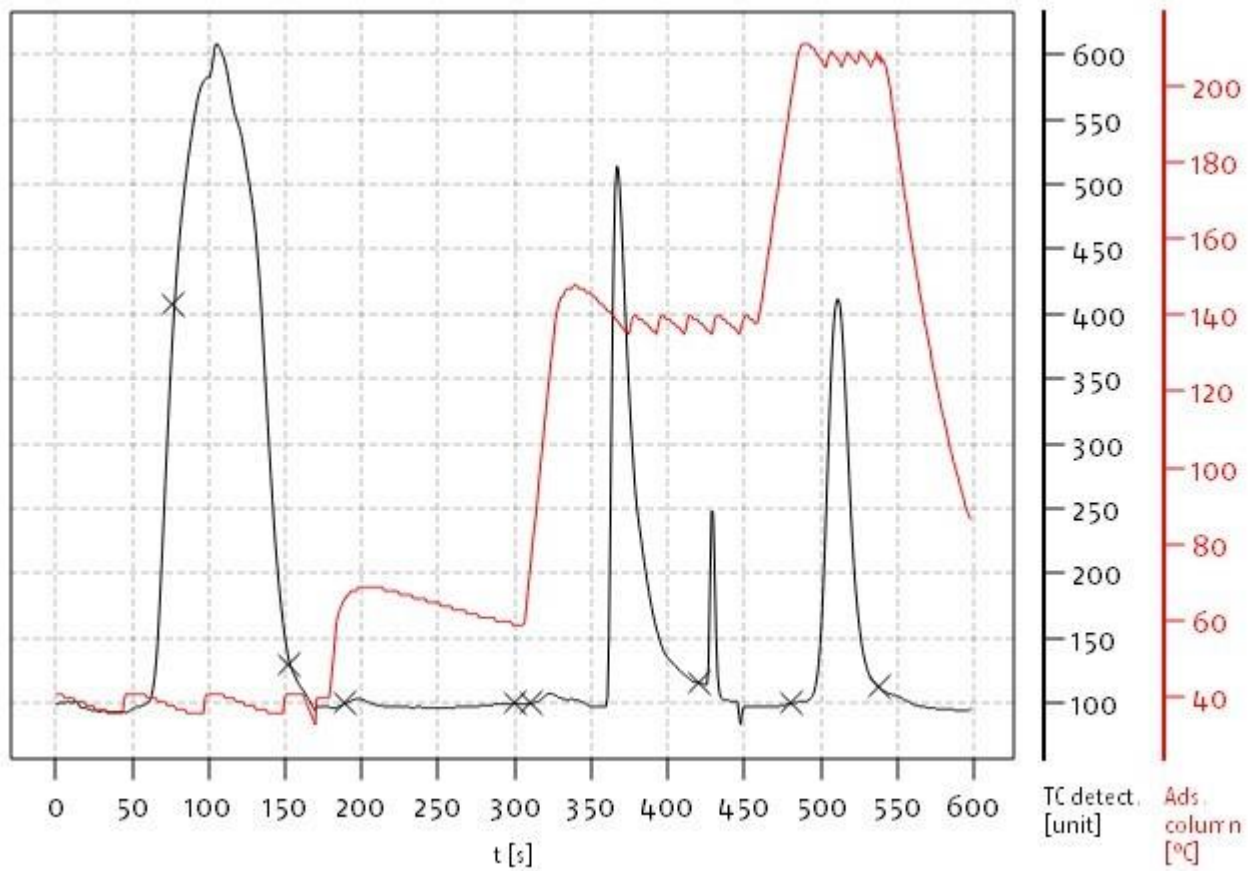

| Weight [mg] | Na me   | Method        | N Area | C Area | H Area | S Area | N [%] | C [%] | H [%] | S [%] | C/N ratio | C/H ratio | Date Time           |
|-------------|---------|---------------|--------|--------|--------|--------|-------|-------|-------|-------|-----------|-----------|---------------------|
| 12 1.0000   | bla nk- | Blank with O2 | 1 370  | 14     | 85     | 129    | 0.00  | 0.00  | 0.000 | 0.000 | 0.0000    | 0.0000    | 05-12-2023 01:14 AM |

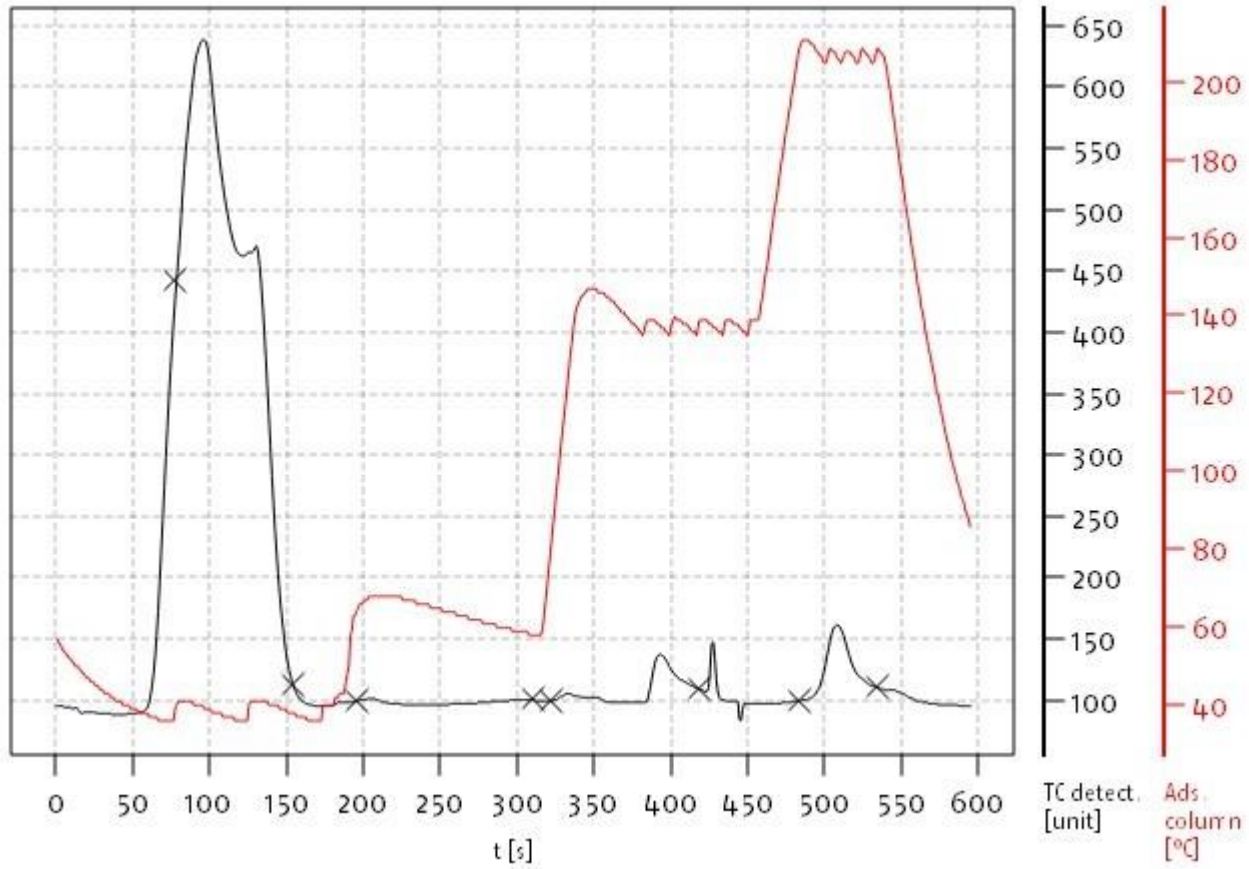

| Weight [mg] | Name | Method       | N Area | C Area | H Area | S Area | N [%] | C [%] | H [%] | S [%] | C/N ratio | C/H ratio | Date Time           |
|-------------|------|--------------|--------|--------|--------|--------|-------|-------|-------|-------|-----------|-----------|---------------------|
| 13 1.1300   | 8e   | 5mg Standard | 2 654  | 25 854 | 7 220  | 123    | 7.06  | 82.69 | 6.158 | 0.069 | 11.7107   | 13.4273   | 05-12-2023 01:26 AM |

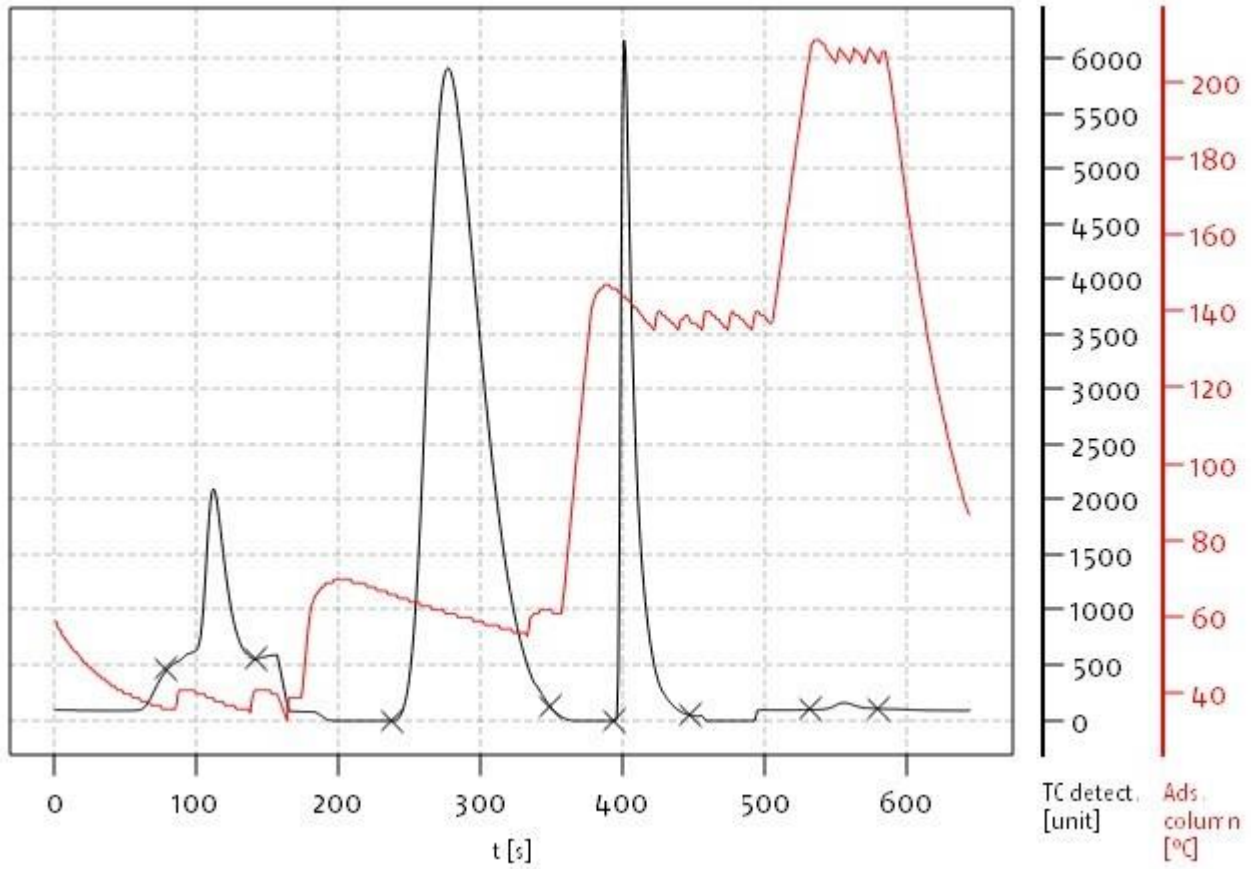

| Weight [mg] | Na me  | Method          | N Area | C Area | H Area | S Area | N [%] | C [%] | H [%] | S [%] | C/N ratio | C/H ratio | Date Time           |
|-------------|--------|-----------------|--------|--------|--------|--------|-------|-------|-------|-------|-----------|-----------|---------------------|
| 14          | 1.0000 | Bla nk- with O2 | 1 236  | 15     | 144    | 117    | 0.00  | 0.00  | 0.000 | 0.000 | 0.0000    | 0.0000    | 05-12-2023 01:36 AM |

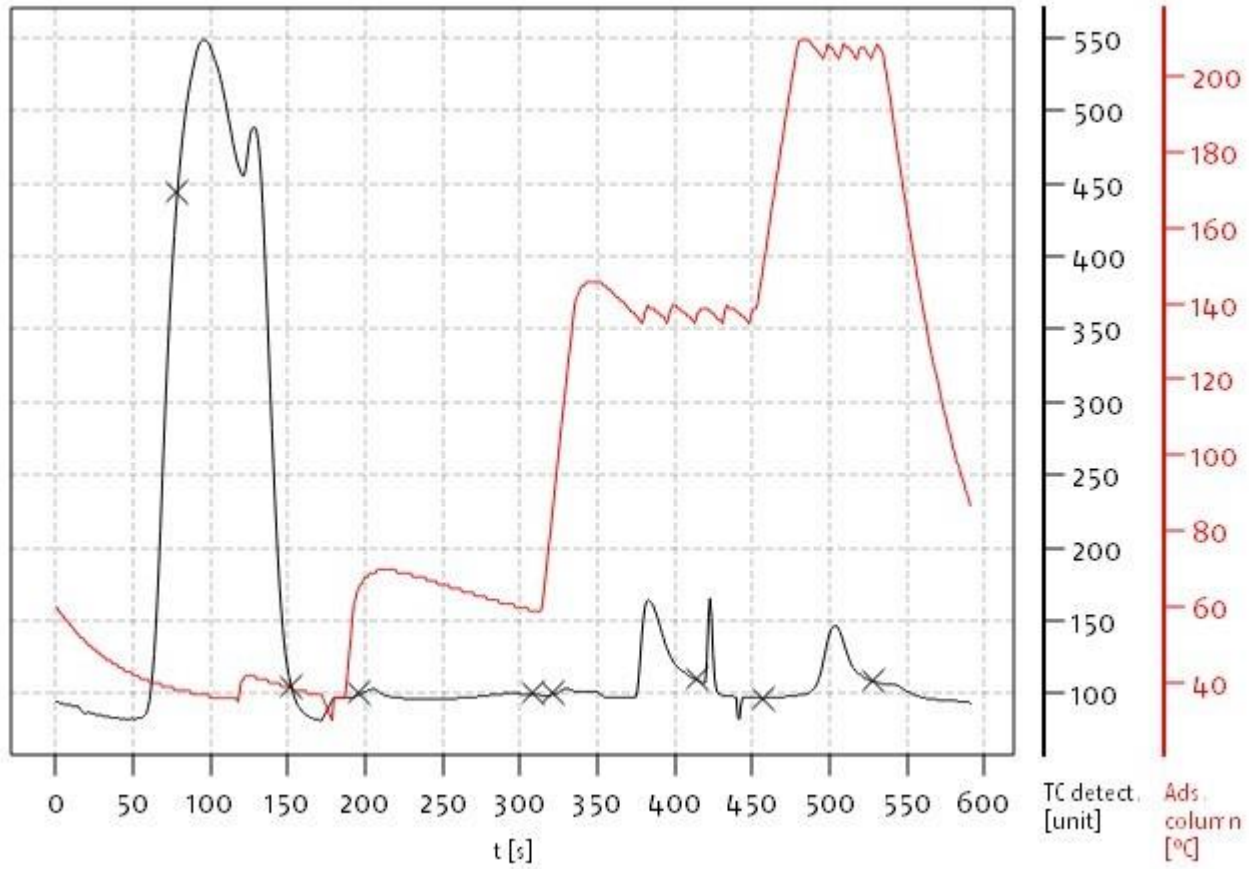



| Weight [mg] | Na me   | Method        | N Area | C Area | H Area | S Area | N [%] | C [%] | H [%] | S [%] | C/N ratio | C/H ratio | Date Time           |
|-------------|---------|---------------|--------|--------|--------|--------|-------|-------|-------|-------|-----------|-----------|---------------------|
| 15 1.0000   | bla nk- | Blank with O2 | 1 245  | 13     | 73     | 77     | 0.00  | 0.00  | 0.000 | 0.000 | 0.0000    | 0.0000    | 05-12-2023 01:46 AM |

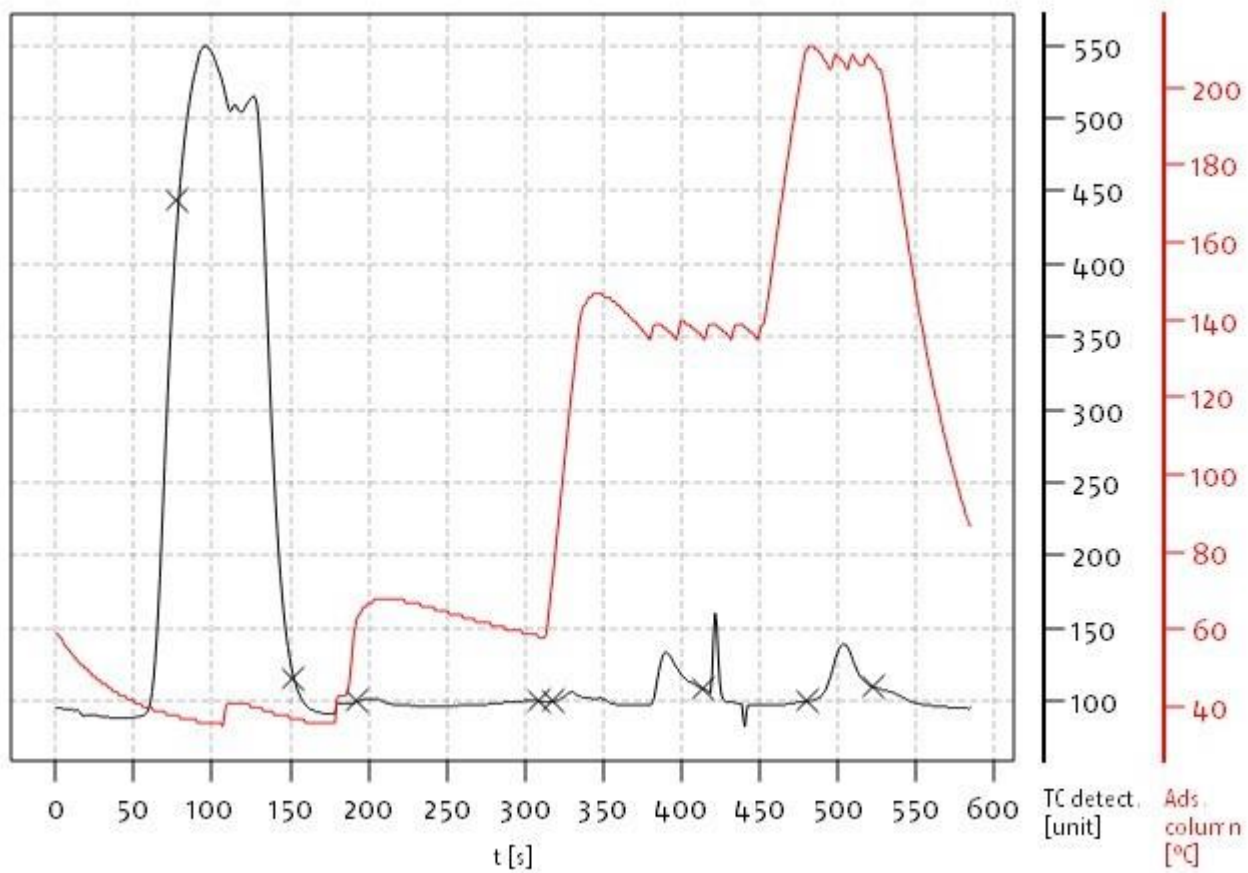

|    | Weight [mg] | Name | Method       | N Area | C Area | H Area | S Area | N [%] | C [%] | H [%] | S [%] | C/N ratio | C/H ratio | Date Time |                     |
|----|-------------|------|--------------|--------|--------|--------|--------|-------|-------|-------|-------|-----------|-----------|-----------|---------------------|
| 16 | 1.3300      | 3d   | 5mg Standard | 5 809  | 32 830 | 8 960  |        | 90    | 12.58 | 80.33 | 7.038 | 0.040     | 6.3847    | 11.4129   | 05-12-2023 01:58 AM |

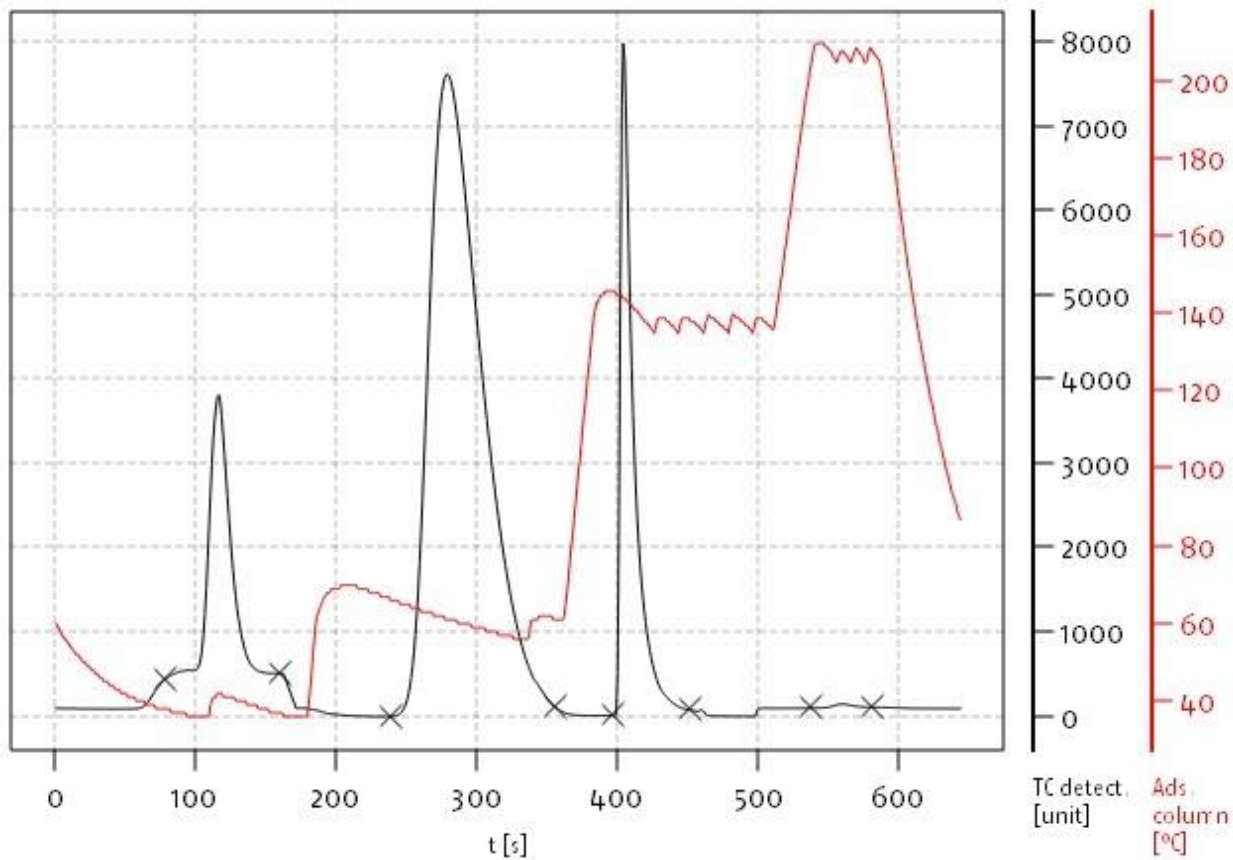

| Weight [mg] | Name   | Method | N Area       | C Area | H Area | S Area | N [%] | C [%] | H [%] | S [%] | C/N ratio | C/H ratio | Date Time |                     |
|-------------|--------|--------|--------------|--------|--------|--------|-------|-------|-------|-------|-----------|-----------|-----------|---------------------|
| 17          | 1.6700 | 9      | 5mg Standard | 6134   | 34987  | 8848   | 83    | 8.46  | 67.73 | 5.377 | 0.288     | 8.0021    | 12.5943   | 05-12-2023 02:09 AM |

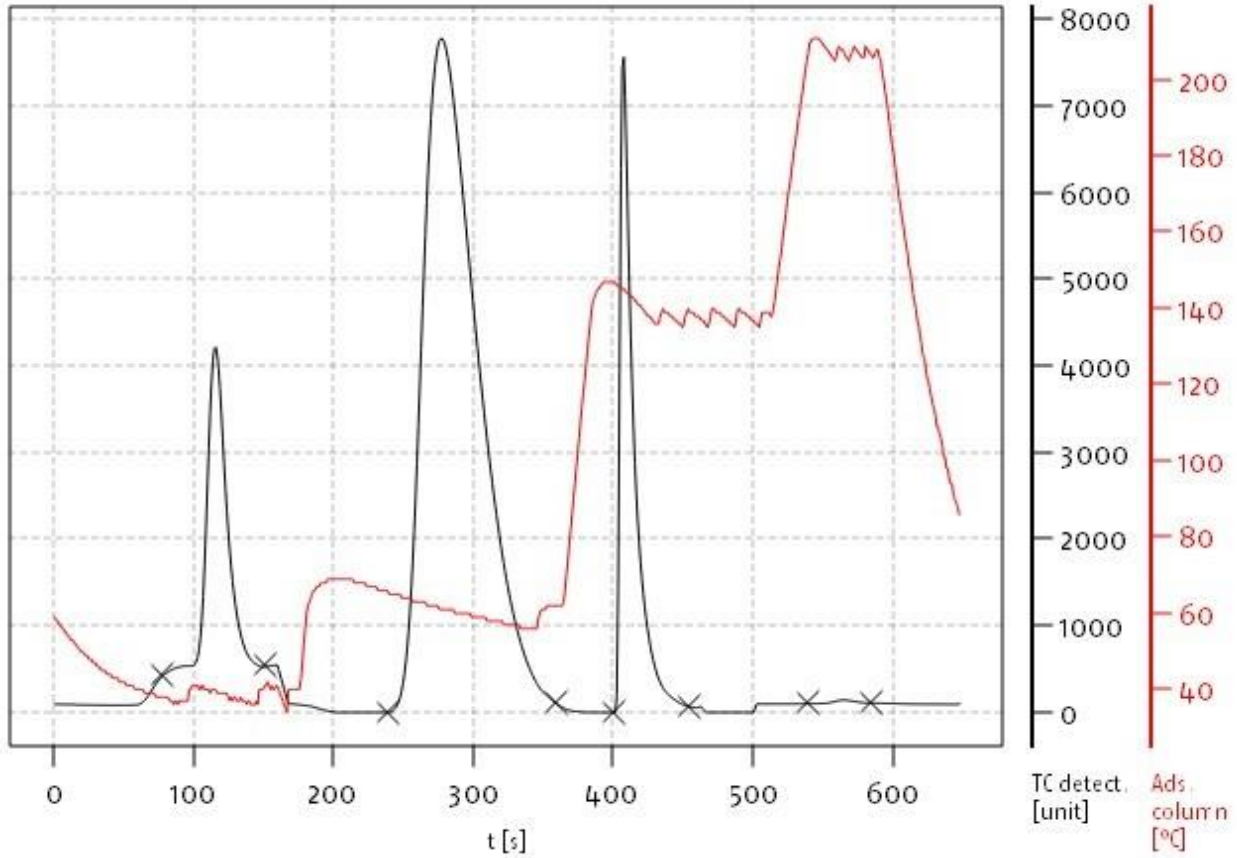

|    | Weight [mg] | Name | Method       | N Area | C Area | H Area | S Area | N [%] | C [%] | H [%] | S [%] | C/N ratio | C/H ratio | Date Time           |
|----|-------------|------|--------------|--------|--------|--------|--------|-------|-------|-------|-------|-----------|-----------|---------------------|
| 18 | 3.2200      | 8s   | 5mg Standard | 12 864 | 71 561 | 17 963 | 109    | 9.89  | 76.86 | 5.532 | 0.021 | 7.7708    | 13.8945   | 05-12-2023 02:20 AM |

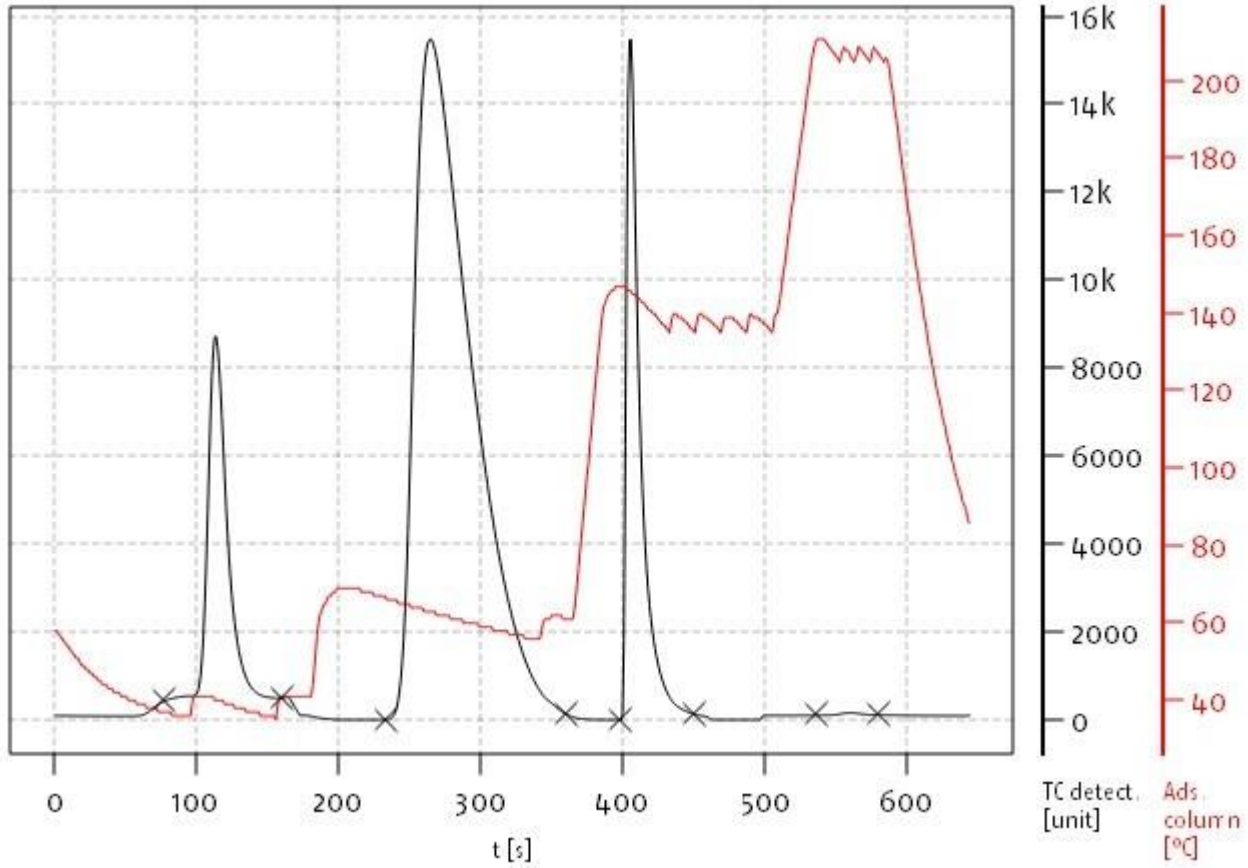

|    | Weight [mg] | Name | Method       | N Area | C Area | H Area | S Area | N [%] | C [%] | H [%] | S [%] | C/N ratio | C/H ratio | Date Time |                     |
|----|-------------|------|--------------|--------|--------|--------|--------|-------|-------|-------|-------|-----------|-----------|-----------|---------------------|
| 19 | 1.7400      | 3f   | 5mg Standard | 9 444  | 40 377 | 11 195 |        | 116   | 12.62 | 72.44 | 5.174 | 0.004     | 5.7405    | 14.0002   | 05-12-2023 02:32 AM |

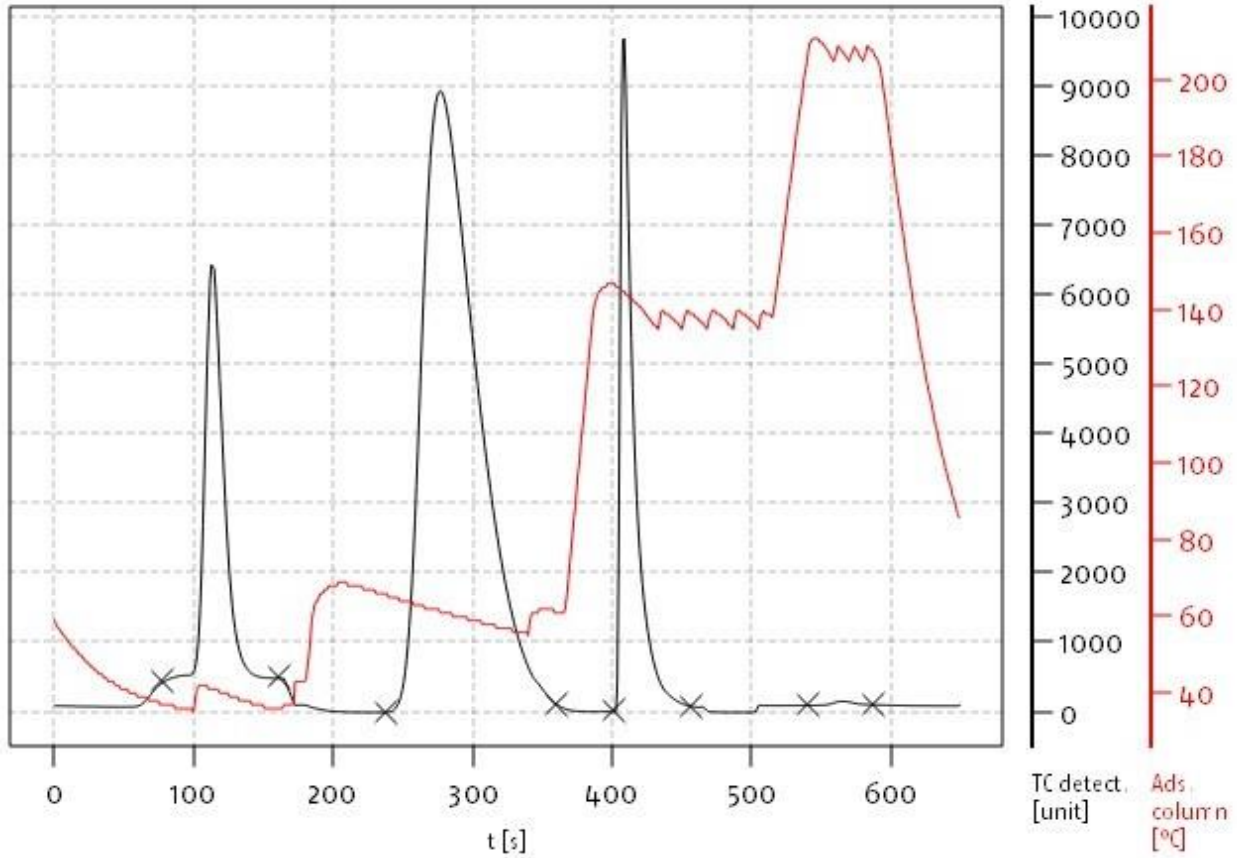

| Weight [mg] | Name   | Method          | N Area | C Area | H Area | S Area | N [%] | C [%] | H [%] | S [%] | C/N ratio | C/H ratio | Date Time           |
|-------------|--------|-----------------|--------|--------|--------|--------|-------|-------|-------|-------|-----------|-----------|---------------------|
| 20          | 1.1000 | 3c 5mg Standard | 3 356  | 21 100 | 7 652  | 113    | 11.63 | 69.77 | 5.333 | 0.006 | 6.0008    | 13.0831   | 05-12-2023 02:43 AM |

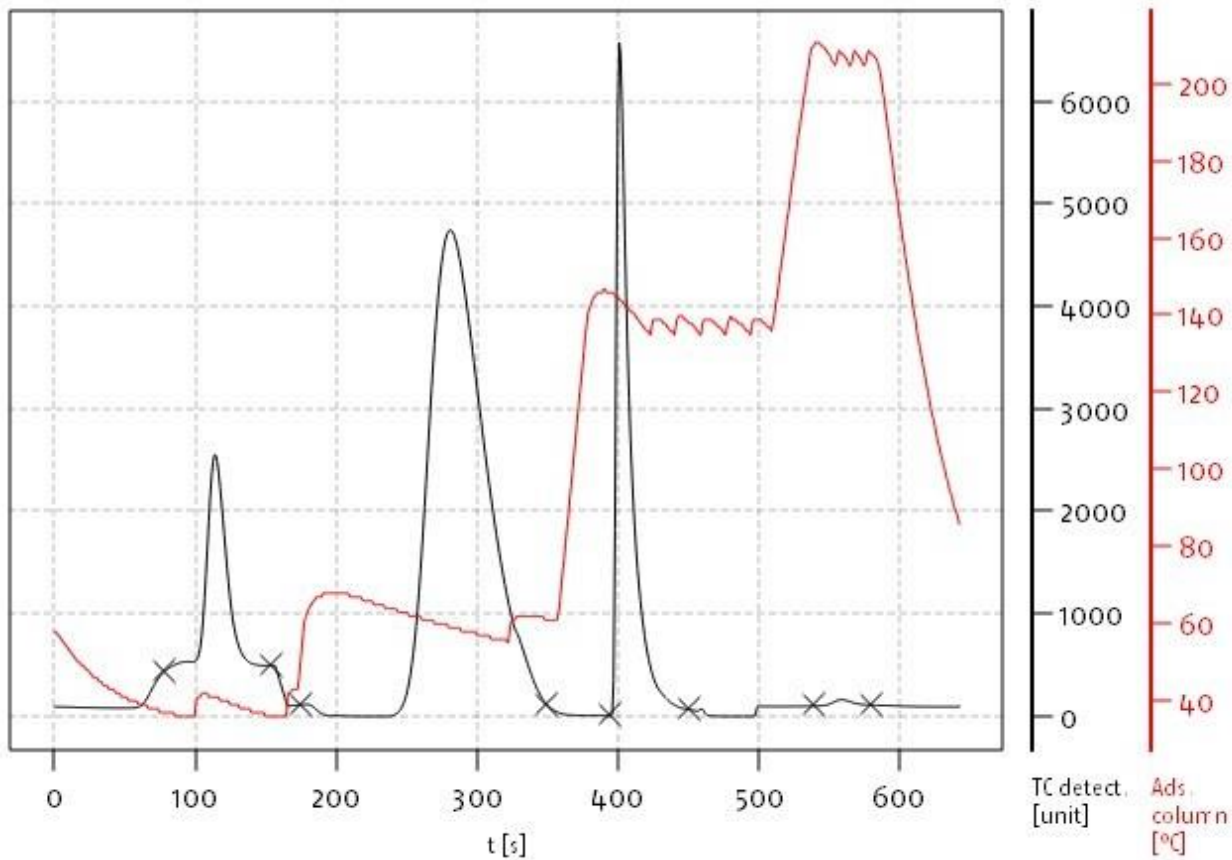

| Weight [mg] | Name | Method       | N Area | C Area | H Area | S Area | N [%] | C [%] | H [%] | S [%] | C/N ratio | C/H ratio | Date Time           |
|-------------|------|--------------|--------|--------|--------|--------|-------|-------|-------|-------|-----------|-----------|---------------------|
| 21 2.9400   | 8k   | 5mg Standard | 8 084  | 67 965 | 18 444 | 225    | 6.65  | 79.64 | 6.217 | 0.005 | 11.9784   | 12.8101   | 05-12-2023 03:09 AM |

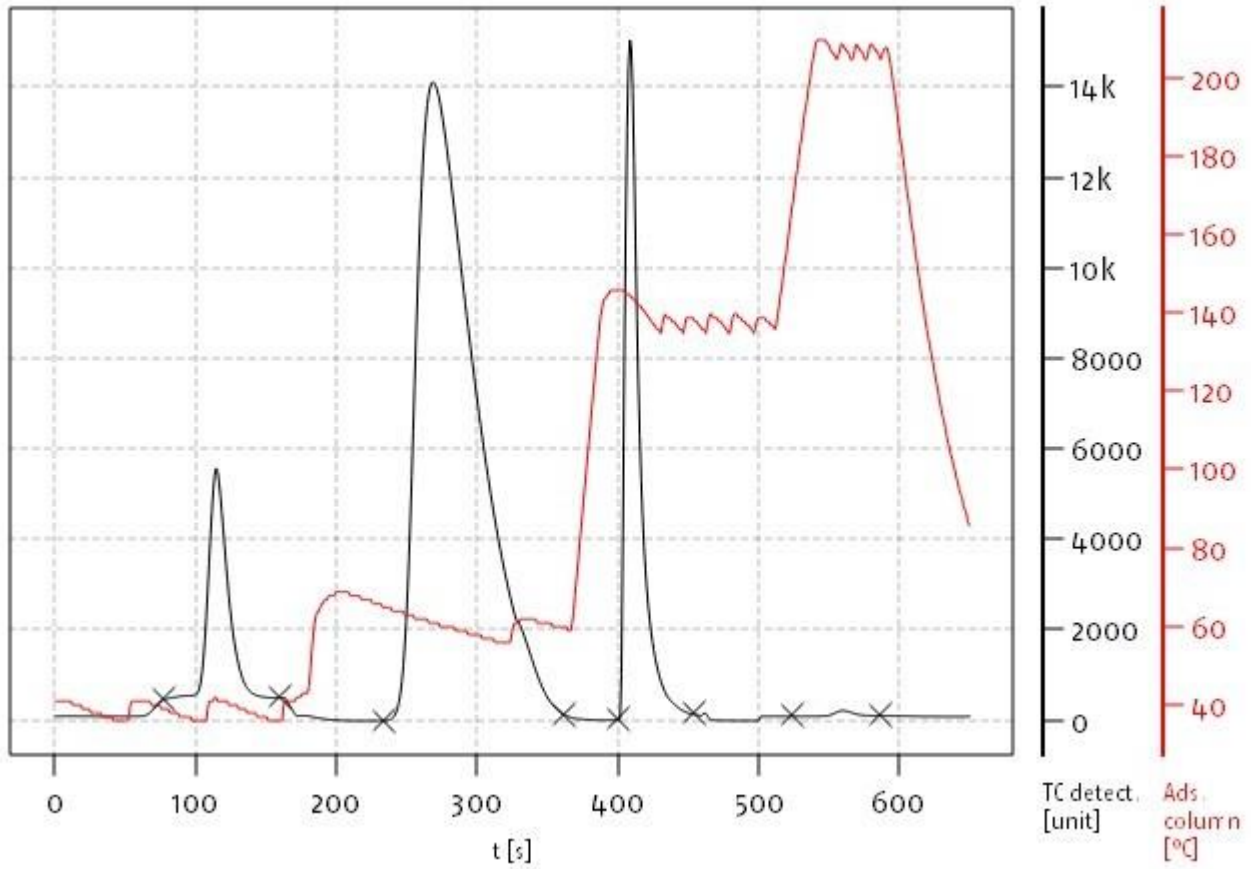



| Weight [mg] | Na me   | Method        | N Area | C Area | H Area | S Area | N [%] | C [%] | H [%] | S [%] | C/N ratio | C/H ratio | Date Time           |
|-------------|---------|---------------|--------|--------|--------|--------|-------|-------|-------|-------|-----------|-----------|---------------------|
| 22 1.0000   | bla nk- | Blank with O2 | 1 388  | 24     | 356    | 124    | 0.00  | 0.00  | 0.000 | 0.000 | 0.0000    | 0.0000    | 05-12-2023 03:25 AM |

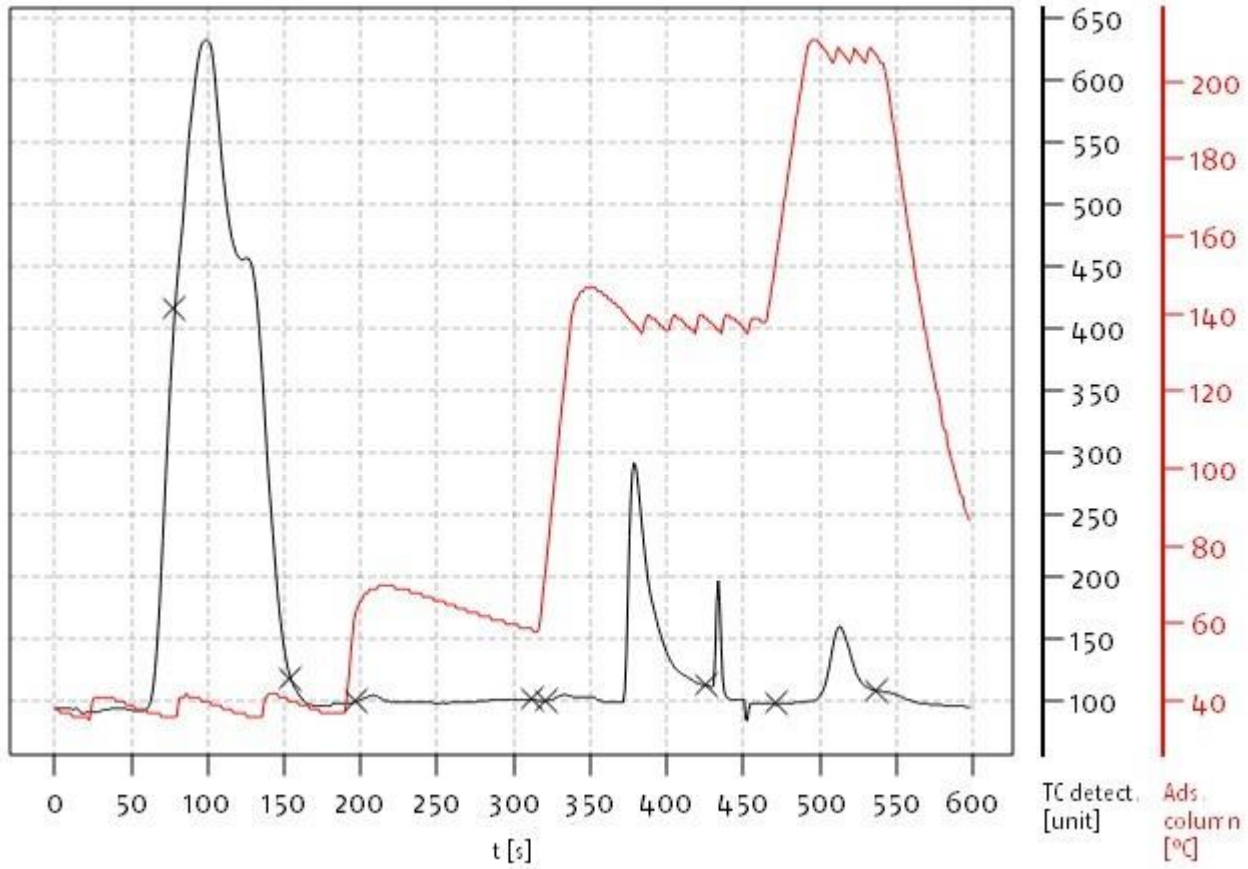

| Weight [mg] | Name   | Method          | N Area | C Area | H Area | S Area | N [%] | C [%] | H [%] | S [%] | C/N ratio | C/H ratio | Date Time           |
|-------------|--------|-----------------|--------|--------|--------|--------|-------|-------|-------|-------|-----------|-----------|---------------------|
| 23          | 2.2900 | 8m 5mg Standard | 8 696  | 48 865 | 12 284 | 105    | 8.90  | 71.91 | 5.391 | 0.003 | 8.0800    | 13.3386   | 05-12-2023 03:36 AM |

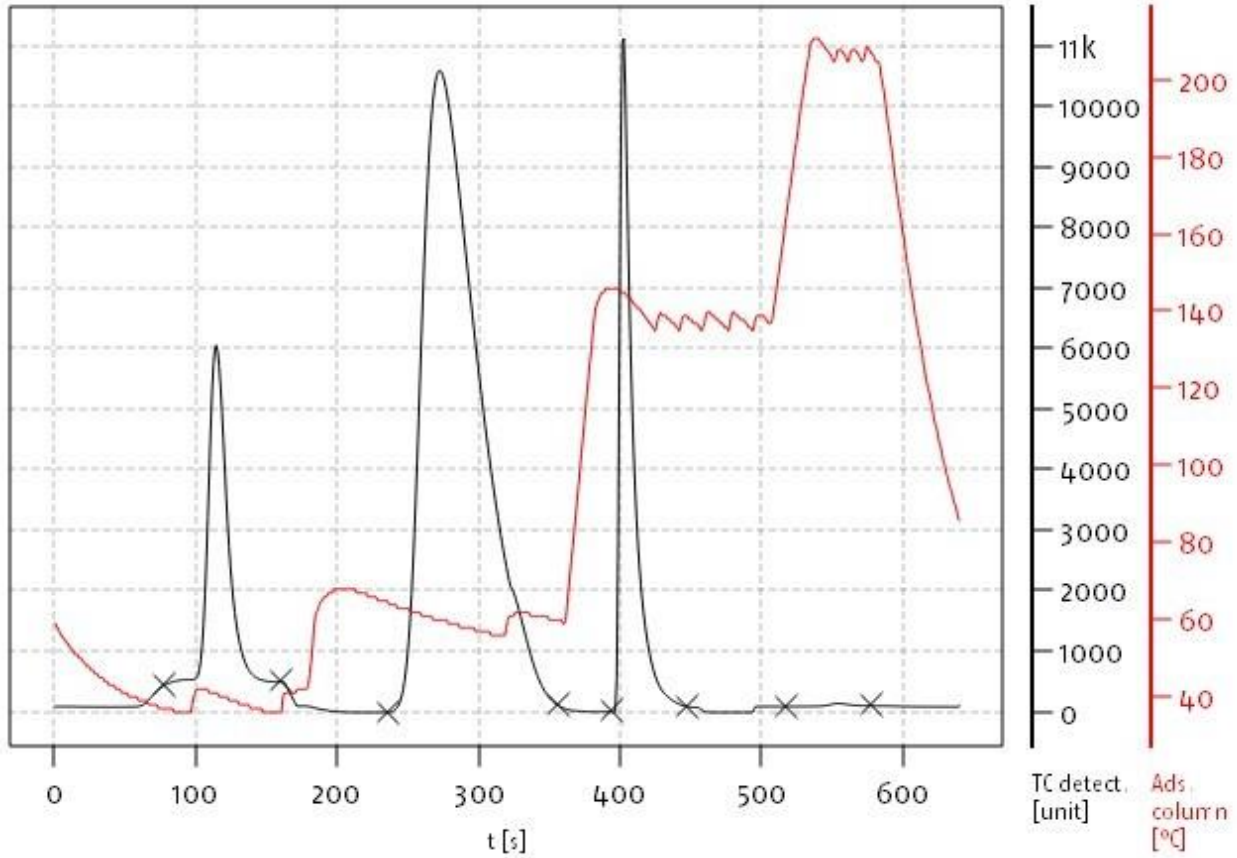

|    | Weight [mg] | Name | Method       | N Area | C Area | H Area | S Area | N [%] | C [%] | H [%] | S [%] | C/N ratio | C/H ratio | Date Time              |
|----|-------------|------|--------------|--------|--------|--------|--------|-------|-------|-------|-------|-----------|-----------|------------------------|
| 39 | 2.4300      | 1    | 5mg Standard | 7 608  | 62 698 | 15 780 | 74     | 7.44  | 86.13 | 6.434 | 0.000 | 11.5753   | 13.3873   | 05-12-2023<br>07:29 AM |

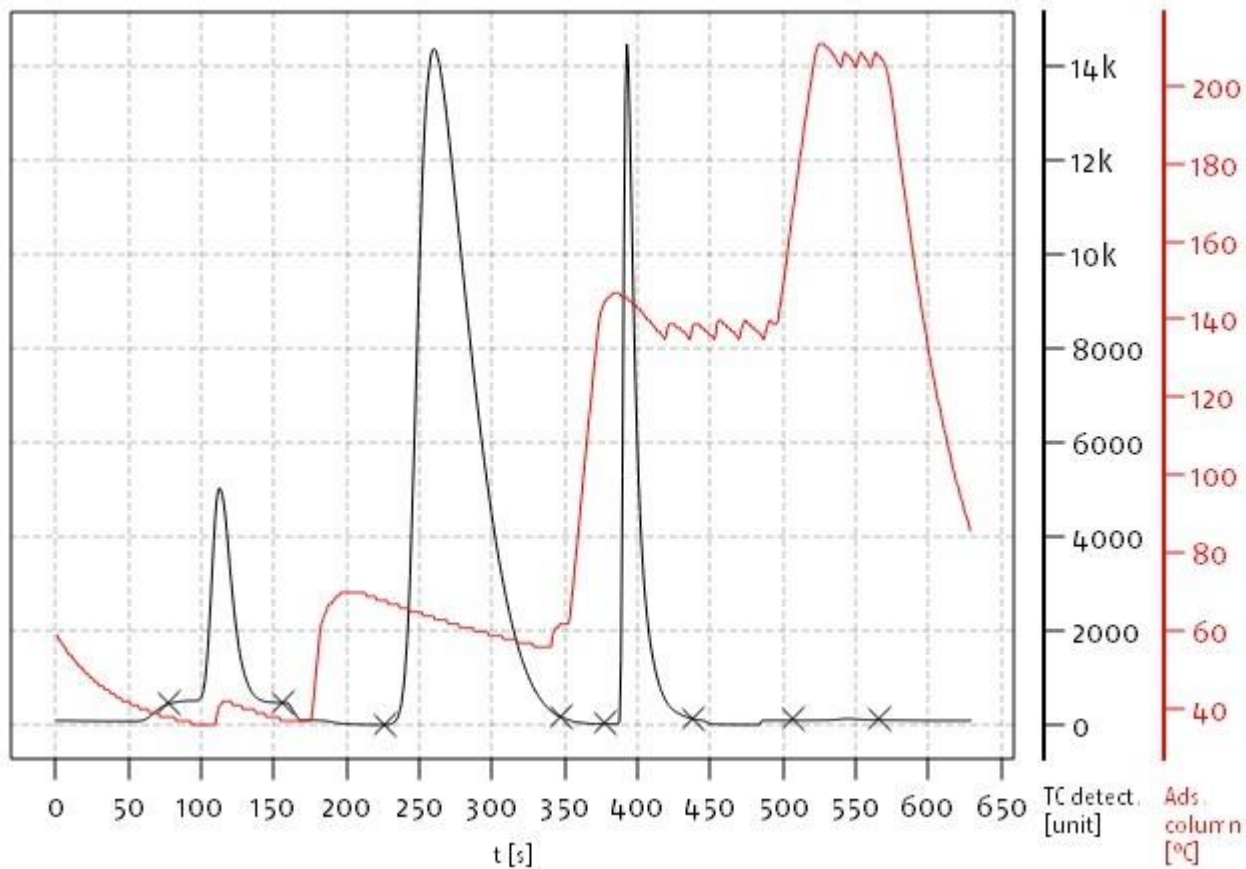



# HPLC analyses

**OBVEZ LABS** Pvt. Ltd.  
committed for quality

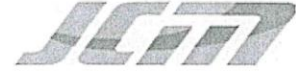

|                |                              |                    |                        |
|----------------|------------------------------|--------------------|------------------------|
| Data file:     | 001.dx                       | Project Name:      | Analysis               |
| Sequence Name: | OBL_12_23_R0090_DKT_PURITY_B | Acquired By:       | V Suresh.              |
| Sample name:   | Blank                        | Injection Date:    | 06-12-2023 12:14:04    |
| Instrument:    | OBL/ALP/LE-389               | Location:          | 1                      |
| Inj. volume:   | 10.0                         | Processing method: | Blank_389_08_12_23.pmx |
| Acq. method:   | DK-TS-BR-ONE-TOL_389_DAD.amx | Processed By:      | V Suresh.              |
| Processed By:  | V Suresh.                    | Processed Date:    | 08-12-2023 16:54:28    |

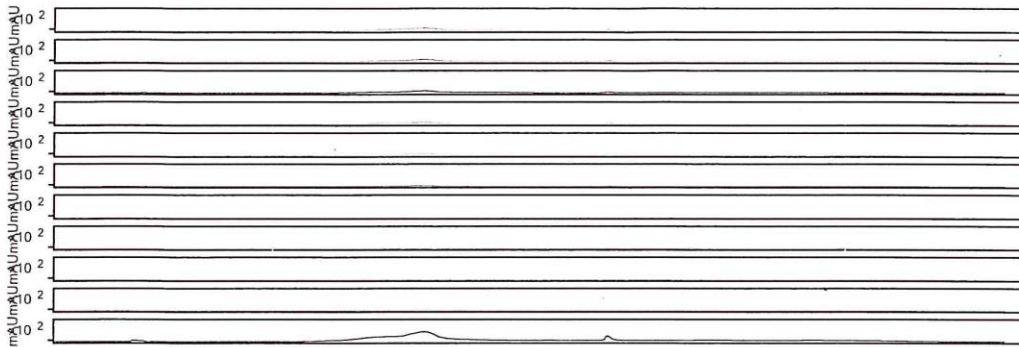

Analysed By: *[Signature]*  
08/12/2023

Checked By: *[Signature]*  
08/12/2023

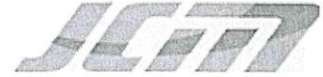

**Data file:** 002.dx  
**Sequence Name:** OBL\_12\_23\_R0090\_DKT\_PURITY\_B  
**Sample name:** Blank  
**Instrument:** OBL/ALP/LE-389  
**Inj. volume:** 10.0  
**Acq. method:** DK-TS-BR-ONE-TOL\_389\_DAD.amx  
**Processed By:** V Suresh.

**Project Name:** Analysis  
**Acquired By:** V Suresh.  
**Injection Date:** 06-12-2023 12:50:31  
**Location:** 1  
**Processing method:** Blank\_389\_08\_12\_23.pmx  
**Processed Date:** 08-12-2023 16:54:28

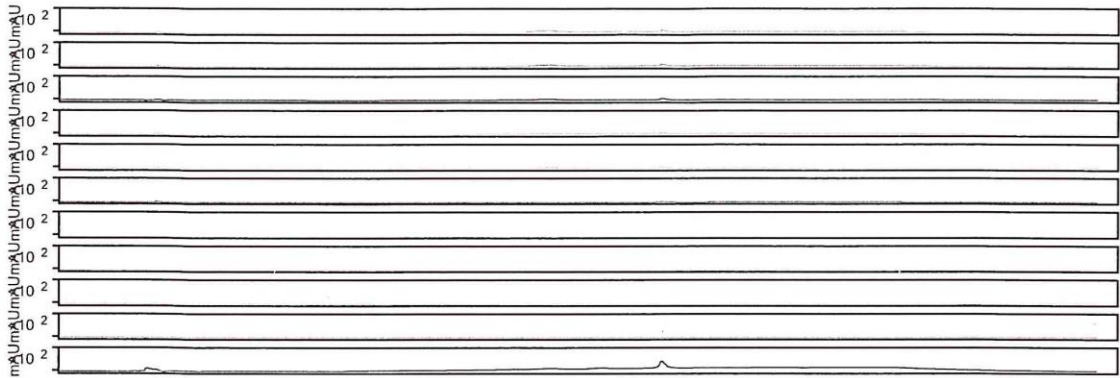

Analysed By: *[Signature]*  
08/12/2023

Checked By: *[Signature]*  
08/12/2023

# HPLC analysis of compound 3i

**OBVEZ LABS** Pvt. Ltd.  
committed for quality

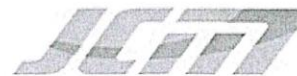

**Data file:** 013.dx  
**Sequence Name:** OBL\_12\_23\_R0090\_DKT\_PURITY\_B **Project Name:** Analysis  
**Sample name:** Reg.no:-OBL/12/23-R0100 B.no:-3i **Acquired By:** V Suresh.  
**Instrument:** OBL/ALP/LE-389 **Injection Date:** 06-12-2023 19:30:39  
**Inj. volume:** 10.0 **Location:** 12  
**Acq. method:** DK-TS-BR-ONE-TOL\_389\_DAD.amx **Processing method:** Sample\_11\_389\_08\_12\_23.pmx  
**Processed By:** V Suresh. **Processed Date:** 08-12-2023 16:54:28

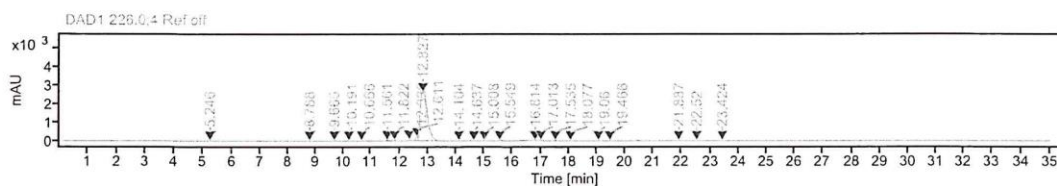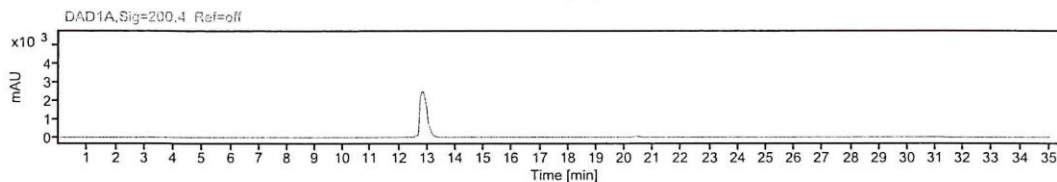

**Signal:** DAD1 226.0;4 Ref off

| Compound Name              | RT [min] | Area      | Area% | Peak Relative Ret Time |
|----------------------------|----------|-----------|-------|------------------------|
| Unknown Peak-1 at226nm     | 5.246    | 45.756    | 0.09  | 0.409                  |
| Unknown Peak-2 at226nm     | 8.788    | 4.780     | 0.01  | 0.685                  |
| Unknown Peak-3 at226nm     | 9.665    | 2.556     | 0.01  | 0.754                  |
| Unknown Peak-4 at226nm     | 10.191   | 6.219     | 0.01  | 0.795                  |
| Unknown Peak-5 at226nm     | 10.666   | 3.469     | 0.01  | 0.832                  |
| Unknown Peak-6 at226nm     | 11.561   | 300.744   | 0.62  | 0.901                  |
| Unknown Peak-7 at226nm     | 11.822   | 217.810   | 0.45  | 0.922                  |
| Unknown Peak-8 at226nm     | 12.339   | 299.586   | 0.62  | 0.962                  |
| Unknown Peak-9 at226nm     | 12.611   | 992.374   | 2.05  | 0.983                  |
| DK-TS-No2-Thio-NH2 at226nm | 12.827   | 46209.886 | 95.27 | 1.000                  |
| Unknown Peak-10 at226nm    | 14.104   | 17.417    | 0.04  | 1.100                  |
| Unknown Peak-11 at226nm    | 14.637   | 5.482     | 0.01  | 1.141                  |
| Unknown Peak-12 at226nm    | 15.008   | 13.057    | 0.03  | 1.170                  |



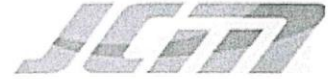

| Compound Name           | RT [min] | Area    | Area% | Peak Relative Ret Time |
|-------------------------|----------|---------|-------|------------------------|
| Unknown Peak-13 at226nm | 15.549   | 107.999 | 0.22  | 1.212                  |
| Unknown Peak-14 at226nm | 16.814   | 57.782  | 0.12  | 1.311                  |
| Unknown Peak-15 at226nm | 17.013   | 105.889 | 0.22  | 1.326                  |
| Unknown Peak-16 at226nm | 17.535   | 33.212  | 0.07  | 1.367                  |
| Unknown Peak-17 at226nm | 18.077   | 10.826  | 0.02  | 1.409                  |
| Unknown Peak-18 at226nm | 19.060   | 3.916   | 0.01  | 1.486                  |
| Unknown Peak-19 at226nm | 19.466   | 38.772  | 0.08  | 1.518                  |
| Unknown Peak-20 at226nm | 21.887   | 4.490   | 0.01  | 1.706                  |
| Unknown Peak-21 at226nm | 22.520   | 6.093   | 0.01  | 1.756                  |
| Unknown Peak-22 at226nm | 23.424   | 14.282  | 0.03  | 1.826                  |

Analysed By: *LD*  
*08/12/2023*

Checked By: *J*  
*08/12/2023*

# HPLC analysis of compound 8b

**OBVEZ LABS** Pvt. Ltd.  
committed for quality

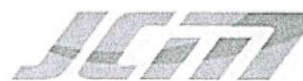

**Data file:** 009.dx  
**Sequence Name:** OBL\_12\_23\_R0090\_DKT\_PURITY\_B  
**Sample name:** Reg.no:-OBL/12/23-R0096 B.no:-8b  
**Instrument:** OBL/ALP/LE-389  
**Inj. volume:** 10.0  
**Acq. method:** DK-TS-BR-ONE-TOL\_389\_DAD.amx  
**Processed By:** V Suresh.

**Project Name:** Analysis  
**Acquired By:** V Suresh.  
**Injection Date:** 06-12-2023 17:05:03  
**Location:** 8  
**Processing method:** Sampl\_7\_389\_08\_12\_23.pmx  
**Processed Date:** 08-12-2023 16:54:28

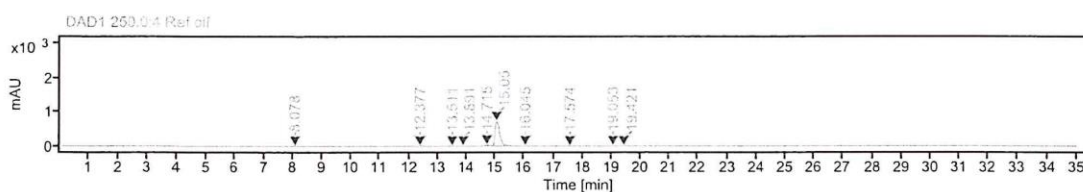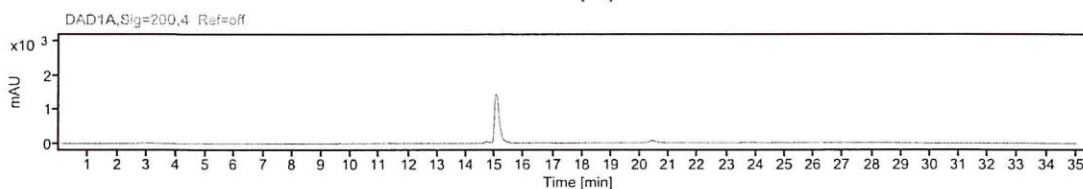

Signal: DAD1 250.0;4 Ref off

| Compound Name              | RT [min] | Area     | Area% | Peak Relative Ret Time |
|----------------------------|----------|----------|-------|------------------------|
| Unknown Peak-1 at250nm     | 8.078    | 7.772    | 0.09  | 0.537                  |
| Unknown Peak-2 at250nm     | 12.377   | 1.233    | 0.01  | 0.822                  |
| Unknown Peak-3 at250nm     | 13.511   | 7.407    | 0.08  | 0.898                  |
| Unknown Peak-4 at250nm     | 13.891   | 11.768   | 0.13  | 0.923                  |
| Unknown Peak-5 at250nm     | 14.715   | 224.545  | 2.55  | 0.978                  |
| DK-TS-CI-A-me-Tol at 250nm | 15.050   | 8539.437 | 96.81 | 1.000                  |
| Unknown Peak-6 at250nm     | 16.045   | 3.603    | 0.04  | 1.066                  |
| Unknown Peak-7 at250nm     | 17.574   | 2.419    | 0.03  | 1.168                  |
| Unknown Peak-8 at250nm     | 19.053   | 12.759   | 0.14  | 1.266                  |
| Unknown Peak-9 at250nm     | 19.421   | 9.990    | 0.11  | 1.290                  |

Analysed By: *V Suresh*  
08/12/2023

Checked By: *V Suresh*  
08/12/2023

# HPLC analysis of compound 8d

**OBVEZ LABS** Pvt. Ltd.  
committed for quality

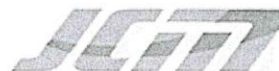

**Data file:** 006.dx  
**Sequence Name:** OBL\_12\_23\_R0090\_DKT\_PURITY\_B **Project Name:** Analysis  
**Sample name:** Reg.no:-OBL/12/23-R0093 B.no:-8d **Acquired By:** V Suresh.  
**Instrument:** OBL/ALP/LE-389 **Injection Date:** 06-12-2023 15:16:00  
**Inj. volume:** 10.0 **Location:** 5  
**Acq. method:** DK-TS-BR-ONE-TOL\_389\_DAD.amx **Processing method:** Sample\_4\_389\_08\_12\_23.pmx  
**Processed By:** V Suresh. **Processed Date:** 08-12-2023 16:54:28

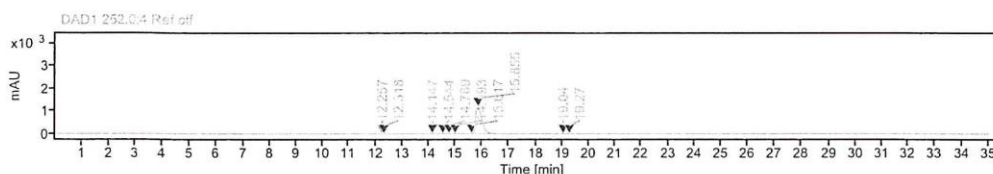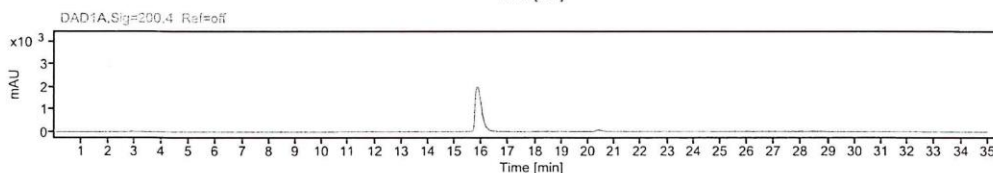

Signal: DAD1 252.0;4 Ref off

| Compound Name                    | RT [min] | Area      | Area% | Peak Relative Ret Time |
|----------------------------------|----------|-----------|-------|------------------------|
| Unknown peak-1 at 252nm          | 12.257   | 3.390     | 0.02  | 0.773                  |
| Unknown peak-2 at 252nm          | 12.318   | 6.606     | 0.03  | 0.777                  |
| Unknown peak-3 at 252nm          | 14.147   | 5.974     | 0.03  | 0.892                  |
| Unknown peak-4 at 252nm          | 14.544   | 8.724     | 0.04  | 0.917                  |
| Unknown peak-5 at 252nm          | 14.769   | 21.339    | 0.11  | 0.932                  |
| Unknown peak-6 at 252nm          | 14.993   | 13.459    | 0.07  | 0.946                  |
| Unknown peak-7 at 252nm          | 15.617   | 46.316    | 0.24  | 0.985                  |
| DK-TS-CI-A-P-CI-Aniline at 252nm | 15.855   | 19386.743 | 99.37 | 1.000                  |
| Unknown peak-8 at 252nm          | 19.040   | 9.968     | 0.05  | 1.201                  |
| Unknown peak-9 at 252nm          | 19.270   | 7.888     | 0.04  | 1.215                  |

Analysed By:

*V Suresh*

Checked By:

*08/12/2023*

# HPLC analysis of compound 8f

**OBVEZ LABS** Pvt. Ltd.  
committed for quality

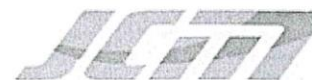

**Data file:** 011.dx  
**Sequence Name:** OBL\_12\_23\_R0090\_DKT\_PURITY\_B **Project Name:** Analysis  
**Sample name:** Reg.no:-OBL/12/23-R0098 B.no:-8f **Acquired By:** V Suresh.  
**Instrument:** OBL/ALP/LE-389 **Injection Date:** 06-12-2023 18:17:51  
**Inj. volume:** 10.0 **Location:** 10  
**Acq. method:** DK-TS-BR-ONE-TOL\_389\_DAD.amx **Processing method:** Sample\_9\_389\_08\_12\_23.pmx  
**Processed By:** V Suresh. **Processed Date:** 08-12-2023 16:54:28

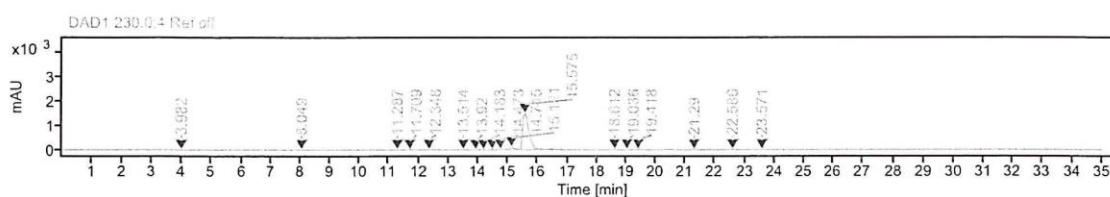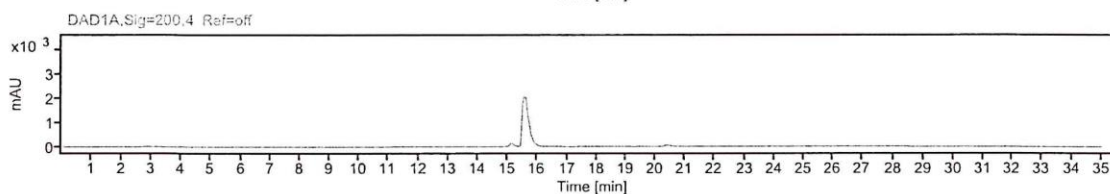

Signal: DAD1 230.0;4 Ref off

| Compound Name                | RT [min] | Area      | Area% | Peak Relative Ret Time |
|------------------------------|----------|-----------|-------|------------------------|
| Unknown Peak-1 at230nm       | 3.982    | 1.480     | 0.01  | 0.256                  |
| Unknown Peak-2 at230nm       | 8.049    | 3.045     | 0.01  | 0.517                  |
| Unknown Peak-3 at230nm       | 11.287   | 4.478     | 0.02  | 0.725                  |
| Unknown Peak-4 at230nm       | 11.709   | 2.508     | 0.01  | 0.752                  |
| Unknown Peak-5 at230nm       | 12.348   | 39.067    | 0.17  | 0.793                  |
| Unknown Peak-6 at230nm       | 13.514   | 4.921     | 0.02  | 0.868                  |
| Unknown Peak-7 at230nm       | 13.920   | 1.927     | 0.01  | 0.894                  |
| Unknown Peak-8 at230nm       | 14.183   | 7.582     | 0.03  | 0.911                  |
| Unknown Peak-9 at230nm       | 14.473   | 20.663    | 0.09  | 0.929                  |
| Unknown Peak-10 at230nm      | 14.745   | 27.783    | 0.12  | 0.947                  |
| Unknown Peak-11 at230nm      | 15.121   | 925.113   | 4.00  | 0.971                  |
| DK-TS-Br-ome-Aniline at230nm | 15.575   | 21979.524 | 95.06 | 1.000                  |
| Unknown Peak-12 at230nm      | 18.612   | 37.383    | 0.16  | 1.195                  |

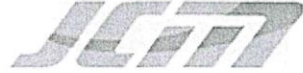

| Compound Name           | RT [min] | Area   | Area% | Peak Relative Ret Time |
|-------------------------|----------|--------|-------|------------------------|
| Unknown Peak-13 at230nm | 19.036   | 4.648  | 0.02  | 1.222                  |
| Unknown Peak-14 at230nm | 19.418   | 24.506 | 0.11  | 1.247                  |
| Unknown Peak-15 at230nm | 21.290   | 2.803  | 0.01  | 1.367                  |
| Unknown Peak-16 at230nm | 22.586   | 17.174 | 0.07  | 1.450                  |
| Unknown Peak-17 at230nm | 23.571   | 17.253 | 0.07  | 1.513                  |

Analysed By: *[Signature]* 08/12/2023

Checked By: *[Signature]* 08/12/2023



# HPLC analysis of compound 8g

**OBVEZ LABS** Pvt. Ltd.  
committed for quality

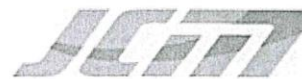

**Data file:** 007.dx  
**Sequence Name:** OBL\_12\_23\_R0090\_DKT\_PURITY\_B **Project Name:** Analysis  
**Sample name:** Reg.no:-OBL/12/23-R0094 B.no:-8g **Acquired By:** V Suresh.  
**Instrument:** OBL/ALP/LE-389 **Injection Date:** 06-12-2023 15:52:21  
**Inj. volume:** 10.0 **Location:** 6  
**Acq. method:** DK-TS-BR-ONE-TOL\_389\_DAD.amx **Processing method:** Sample\_5\_389\_08\_12\_23.pmx  
**Processed By:** V Suresh. **Processed Date:** 08-12-2023 16:54:28

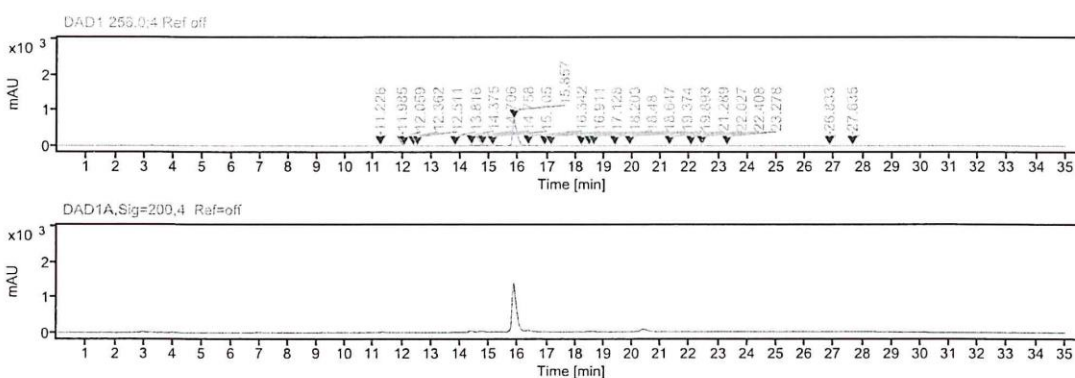

**Signal:** DAD1 256.0;4 Ref off

| Compound Name                  | RT [min] | Area     | Area% | Peak Relative Ret Time |
|--------------------------------|----------|----------|-------|------------------------|
| Unknown Peak-1 at256nm         | 11.226   | 25.557   | 0.28  | 0.708                  |
| Unknown Peak-2 at256nm         | 11.985   | 5.186    | 0.06  | 0.756                  |
| Unknown Peak-3 at256nm         | 12.059   | 12.177   | 0.13  | 0.760                  |
| Unknown Peak-4 at256nm         | 12.362   | 9.719    | 0.11  | 0.780                  |
| Unknown Peak-5 at256nm         | 12.511   | 13.811   | 0.15  | 0.789                  |
| Unknown Peak-6 at256nm         | 13.816   | 15.510   | 0.17  | 0.871                  |
| Unknown Peak-7 at256nm         | 14.375   | 210.093  | 2.32  | 0.907                  |
| Unknown Peak-8 at256nm         | 14.706   | 104.581  | 1.16  | 0.927                  |
| Unknown Peak-9 at256nm         | 14.758   | 82.097   | 0.91  | 0.931                  |
| Unknown Peak-10 at256nm        | 15.105   | 16.658   | 0.18  | 0.953                  |
| DK-TS-No2-Ome-Aniline at 256nm | 15.857   | 7986.980 | 88.31 | 1.000                  |
| Unknown Peak-11 at256nm        | 16.342   | 237.158  | 2.62  | 1.031                  |
| Unknown Peak-12 at256nm        | 16.911   | 31.652   | 0.35  | 1.066                  |

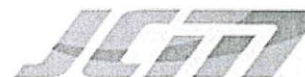

| Compound Name           | RT [min] | Area   | Area% | Peak Relative Ret Time |
|-------------------------|----------|--------|-------|------------------------|
| Unknown Peak-13 at256nm | 17.128   | 13.282 | 0.15  | 1.080                  |
| Unknown Peak-14 at256nm | 18.203   | 21.131 | 0.23  | 1.148                  |
| Unknown Peak-15 at256nm | 18.480   | 37.378 | 0.41  | 1.165                  |
| Unknown Peak-16 at256nm | 18.647   | 66.608 | 0.74  | 1.176                  |
| Unknown Peak-17 at256nm | 19.374   | 4.855  | 0.05  | 1.222                  |
| Unknown Peak-18 at256nm | 19.893   | 29.363 | 0.32  | 1.254                  |
| Unknown Peak-19 at256nm | 21.289   | 3.458  | 0.04  | 1.343                  |
| Unknown Peak-20 at256nm | 22.027   | 7.761  | 0.09  | 1.389                  |
| Unknown Peak-21 at256nm | 22.408   | 51.202 | 0.57  | 1.413                  |
| Unknown Peak-22 at256nm | 23.278   | 4.942  | 0.05  | 1.468                  |
| Unknown Peak-23 at256nm | 26.833   | 21.972 | 0.24  | 1.692                  |
| Unknown Peak-24 at256nm | 27.635   | 30.664 | 0.34  | 1.743                  |

Analysed By: *[Signature]*  
03/12/2023

Checked By: *[Signature]*  
08/12/2023



# HPLC analysis of compound 8h

**OBVEZ LABS** Pvt. Ltd.  
committed for quality

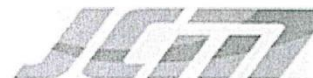

**Data file:** 010.dx  
**Sequence Name:** OBL\_12\_23\_R0090\_DKT\_PURITY\_B **Project Name:** Analysis  
**Sample name:** Reg.no:-OBL/12/23-R0097 B.no:-8h **Acquired By:** V Suresh.  
**Instrument:** OBL/ALP/LE-389 **Injection Date:** 06-12-2023 17:41:27  
**Inj. volume:** 10.0 **Location:** 9  
**Acq. method:** DK-TS-BR-ONE-TOL\_389\_DAD.amx **Processing method:** Sample\_8\_389\_08\_12\_23.pmx  
**Processed By:** V Suresh. **Processed Date:** 08-12-2023 16:48:42

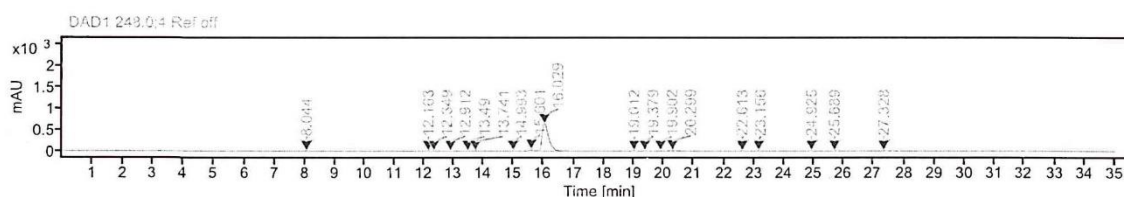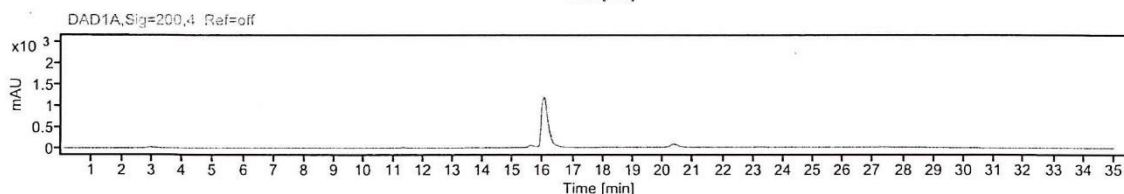

**Signal:** DAD1 248.0;4 Ref off

| Compound Name              | RT [min] | Area     | Area% | Peak Relative Ret Time |
|----------------------------|----------|----------|-------|------------------------|
| Unknown Peak-1 at248nm     | 8.044    | 8.402    | 0.08  | 0.502                  |
| Unknown Peak-2 at248nm     | 12.163   | 1.018    | 0.01  | 0.759                  |
| Unknown Peak-3 at248nm     | 12.349   | 5.538    | 0.05  | 0.770                  |
| Unknown Peak-4 at248nm     | 12.912   | 3.733    | 0.04  | 0.806                  |
| Unknown Peak-5 at248nm     | 13.490   | 6.136    | 0.06  | 0.842                  |
| Unknown Peak-6 at248nm     | 13.741   | 2.258    | 0.02  | 0.857                  |
| Unknown Peak-7 at248nm     | 14.993   | 16.546   | 0.16  | 0.935                  |
| Unknown Peak-8 at248nm     | 15.601   | 344.686  | 3.33  | 0.973                  |
| DK-TS-CI-A-Ome-Tol at248nm | 16.029   | 9652.916 | 93.13 | 1.000                  |
| Unknown Peak-9 at248nm     | 19.012   | 12.768   | 0.12  | 1.186                  |
| Unknown Peak-10 at248nm    | 19.379   | 21.634   | 0.21  | 1.209                  |
| Unknown Peak-11 at248nm    | 19.902   | 6.203    | 0.06  | 1.242                  |
| Unknown Peak-12 at248nm    | 20.299   | 194.021  | 1.87  | 1.266                  |

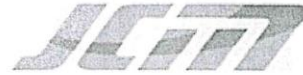

| Compound Name           | RT [min] | Area   | Area% | Peak Relative Ret Time |
|-------------------------|----------|--------|-------|------------------------|
| Unknown Peak-13 at248nm | 22.613   | 12.523 | 0.12  | 1.411                  |
| Unknown Peak-14 at248nm | 23.156   | 11.551 | 0.11  | 1.445                  |
| Unknown Peak-15 at248nm | 24.925   | 17.473 | 0.17  | 1.555                  |
| Unknown Peak-16 at248nm | 25.689   | 14.384 | 0.14  | 1.603                  |
| Unknown Peak-17 at248nm | 27.328   | 33.515 | 0.32  | 1.705                  |

Analysed By: *[Signature]*  
08/12/2023

Checked By: *[Signature]*  
08/12/2023

# HPLC analysis of compound 8j

**OBVEZ LABS** Pvt. Ltd.  
committed for quality

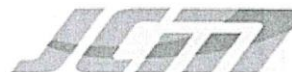

**Data file:** 003.dx  
**Sequence Name:** OBL\_12\_23\_R0090\_DKT\_PURITY\_B **Project Name:** Analysis  
**Sample name:** Reg.no:-OBL/12/23-R0090 B.no:-8j **Acquired By:** V Suresh.  
**Instrument:** OBL/ALP/LE-389 **Injection Date:** 06-12-2023 13:26:55  
**Inj. volume:** 10.0 **Location:** 2  
**Acq. method:** DK-TS-BR-ONE-TOL\_389\_DAD.amx **Processing method:** Sample\_1\_389\_08\_12\_23.pmx  
**Processed By:** V Suresh. **Processed Date:** 08-12-2023 16:54:28

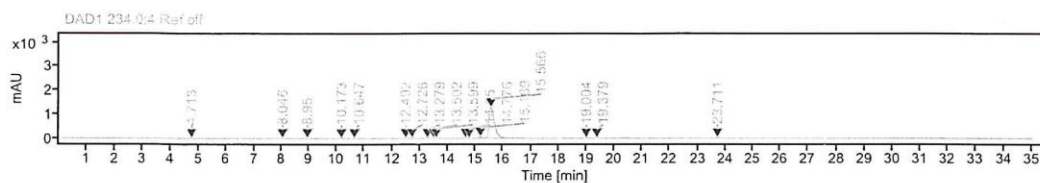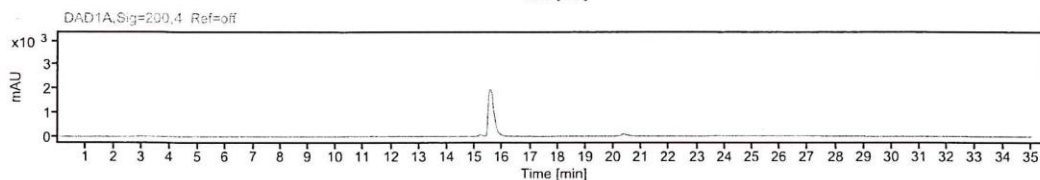

**Signal:** DAD1 234.0:4 Ref off

| Compound Name            | RT [min] | Area    | Area% | Peak Relative Ret Time |
|--------------------------|----------|---------|-------|------------------------|
| Unknown Peak-1 at 234nm  | 4.713    | 3.993   | 0.02  | 0.303                  |
| Unknown Peak-2 at 234nm  | 8.047    | 3.048   | 0.02  | 0.517                  |
| Unknown Peak-3 at 234nm  | 8.950    | 1.396   | 0.01  | 0.575                  |
| Unknown Peak-4 at 234nm  | 10.173   | 3.330   | 0.02  | 0.654                  |
| Unknown Peak-5 at 234nm  | 10.647   | 2.108   | 0.01  | 0.684                  |
| Unknown Peak-6 at 234nm  | 12.492   | 25.639  | 0.14  | 0.803                  |
| Unknown Peak-7 at 234nm  | 12.726   | 1.736   | 0.01  | 0.818                  |
| Unknown Peak-8 at 234nm  | 13.279   | 1.253   | 0.01  | 0.853                  |
| Unknown Peak-9 at 234nm  | 13.502   | 7.315   | 0.04  | 0.867                  |
| Unknown Peak-10 at 234nm | 13.599   | 3.472   | 0.02  | 0.874                  |
| Unknown Peak-11 at 234nm | 14.650   | 17.641  | 0.09  | 0.941                  |
| Unknown Peak-12 at 234nm | 14.776   | 10.137  | 0.05  | 0.949                  |
| Unknown Peak-13 at 234nm | 15.189   | 422.375 | 2.25  | 0.976                  |

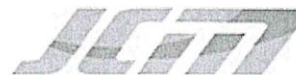

| Compound Name             | RT [min] | Area      | Area% | Peak Relative Ret Time |
|---------------------------|----------|-----------|-------|------------------------|
| DK-TS-Br-One-Tol at 234nm | 15.566   | 18056.144 | 96.39 | 1.000                  |
| Unknown Peak-14 at 234nm  | 19.004   | 17.016    | 0.09  | 1.221                  |
| Unknown Peak-15 at 234nm  | 19.379   | 31.033    | 0.17  | 1.245                  |
| Unknown Peak-16 at 234nm  | 23.711   | 124.978   | 0.67  | 1.523                  |

Analysed By: *[Signature]*  
08/12/2023

Checked By: *[Signature]*  
08/12/2023

# HPLC analysis of compound 8I

**OBVEZ LABS** Pvt., Ltd.  
committed for quality

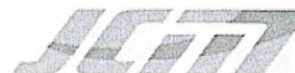

Data file: 014.dx  
 Sequence Name: OBL\_12\_23\_R0090\_DKT\_PURITY\_B Project Name: Analysis  
 Sample name: Reg.no:-OBL/12/23-R0101 B.no:-81 Acquired By: V Suresh.  
 Instrument: OBL/ALP/LE-389 Injection Date: 06-12-2023 20:07:04  
 Inj. volume: 10.0 Location: 13  
 Acq. method: DK-TS-BR-ONE-TOL\_389\_DAD.amx Processing method: Sample\_12\_389\_08\_12\_23.pmx  
 Processed By: V Suresh. Processed Date: 08-12-2023 16:54:28

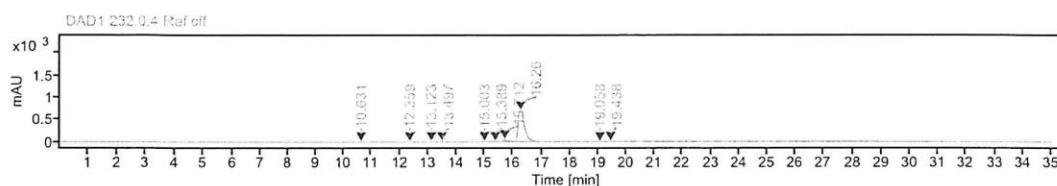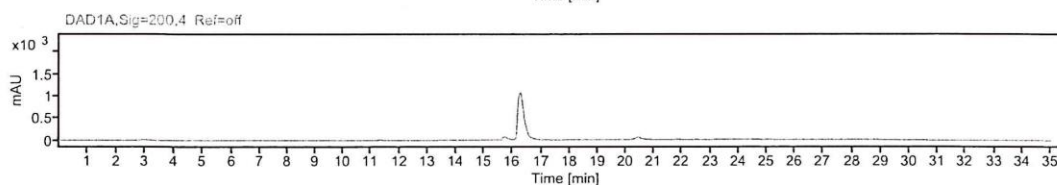

Signal: DAD1 232.0;4 Ref off

| Compound Name                  | RT [min] | Area      | Area% | Peak Relative Ret Time |
|--------------------------------|----------|-----------|-------|------------------------|
| Unknown Peak-1 at232nm         | 10.631   | 2.173     | 0.02  | 0.654                  |
| Unknown Peak-2 at232nm         | 12.359   | 3.522     | 0.03  | 0.760                  |
| Unknown Peak-3 at232nm         | 13.123   | 10.146    | 0.09  | 0.807                  |
| Unknown Peak-4 at232nm         | 13.497   | 7.306     | 0.06  | 0.830                  |
| Unknown Peak-5 at232nm         | 15.003   | 16.663    | 0.14  | 0.923                  |
| Unknown Peak-6 at232nm         | 15.389   | 24.717    | 0.21  | 0.946                  |
| Unknown Peak-7 at232nm         | 15.712   | 540.167   | 4.68  | 0.966                  |
| DK-TS-Br-Ome-Anisidine at232nm | 16.260   | 10901.134 | 94.46 | 1.000                  |
| Unknown Peak-8 at232nm         | 19.058   | 8.424     | 0.07  | 1.172                  |
| Unknown Peak-9 at232nm         | 19.438   | 26.492    | 0.23  | 1.195                  |

Analysed By: *[Signature]*  
08/12/2023

Checked By: *[Signature]*  
08/12/2023
